# Supplementary material
Source: PubMed Central journal article supplement (PMC2866776)

## **Synthesis of chiral polyaminothiazoles**

**Sergey Arutyunyan and Adel Nefzi\***

Torrey Pines Institute for Molecular Studies  
11350 SW Village Parkway, Port Saint Lucie, FL 34987

Supporting Information

## Structures of the dithiazoles

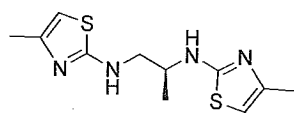

5a

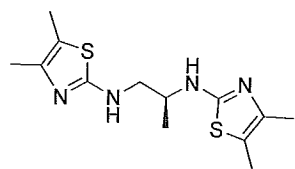

5b

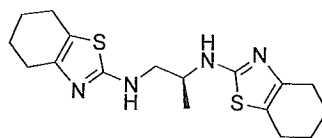

5c

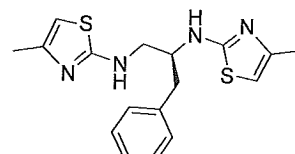

5d

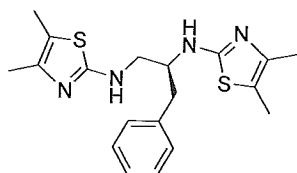

5e

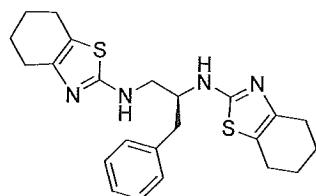

5f

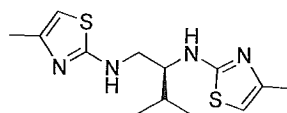

5g

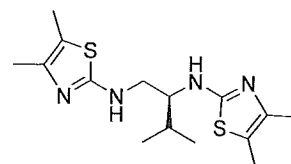

5h

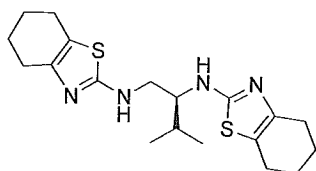

5m

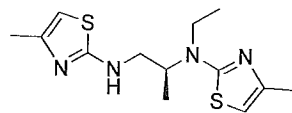

5n

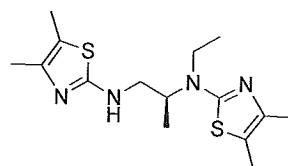

5o

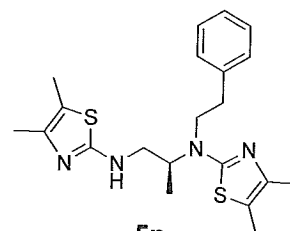

5p

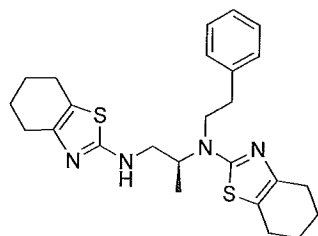

5i

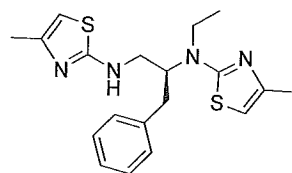

5j

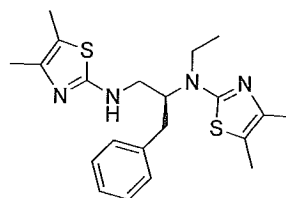

5k

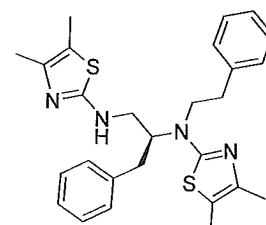

5l

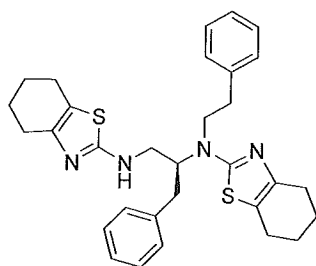

5q

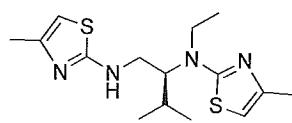

5r

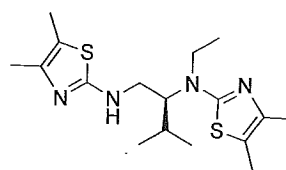

5s

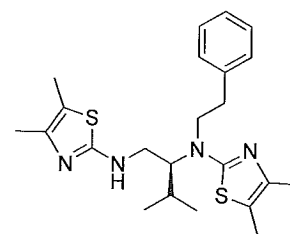

5t

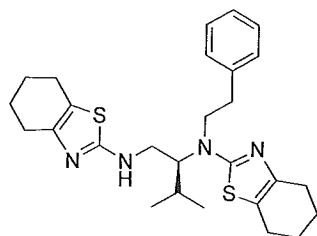

5u

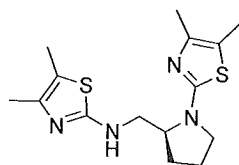

5v

## Structures of the tetrathiazoles

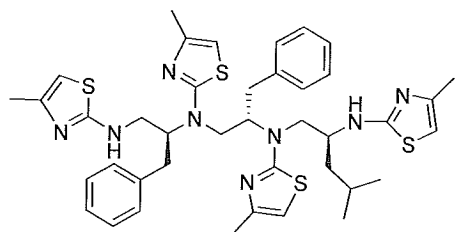

PT-1

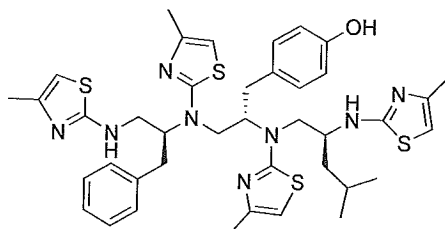

PT-2

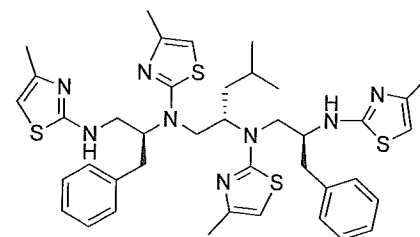

PT-3

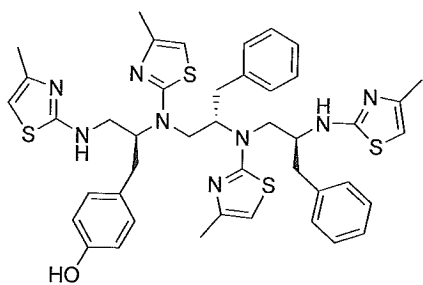

PT-4

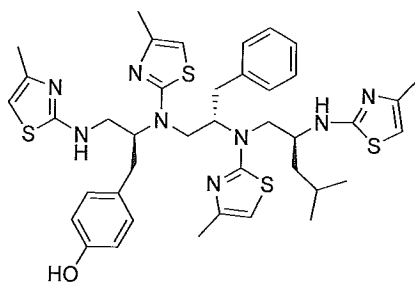

PT-5

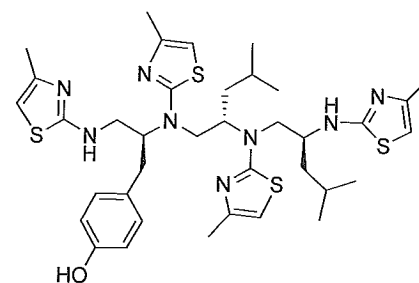

PT-6

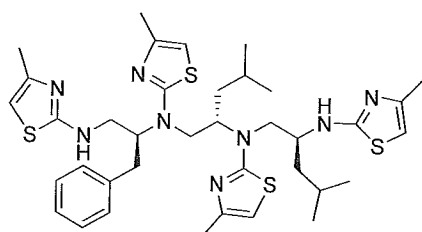

PT-7

Date Acquired : 10/22/2009 4:11:48 PM  
 Sample Name : 1777-8  
 Sample ID : T18  
 Vial # : 96  
 Injection Volume : 5  
 Data File : 1777-8 T18.lcd  
 Method File : 6min 5.05 1Mn Clean(254) 214AQ1 1.lem

Sample Information

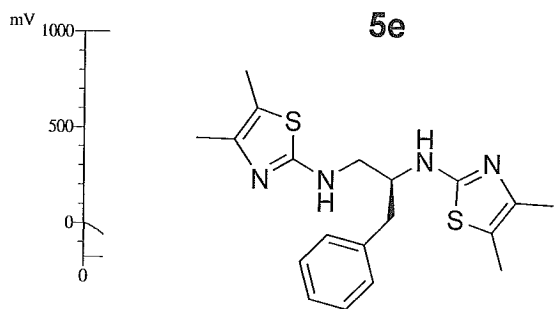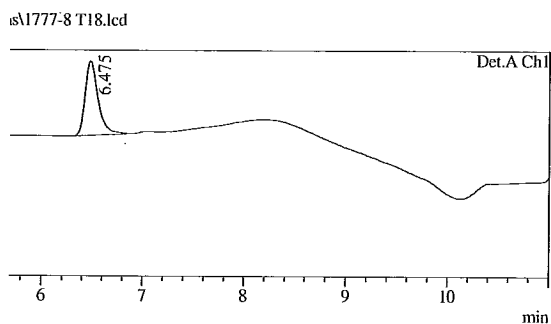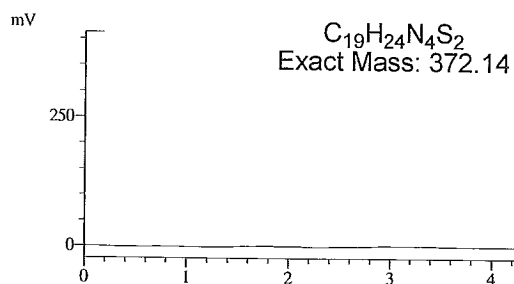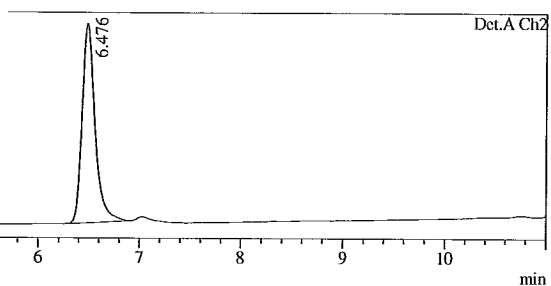

1 Det.A Ch1 / 214nm  
 2 Det.A Ch2 / 254nm

PeakTable

| Peak# | Ret. Time | Area    | Height | Area %  | Height % |
|-------|-----------|---------|--------|---------|----------|
| 1     | 6.475     | 3490452 | 387072 | 100.000 | 100.000  |
| Total |           | 3490452 | 387072 | 100.000 | 100.000  |

PeakTable

| Peak# | Ret. Time | Area    | Height | Area %  | Height % |
|-------|-----------|---------|--------|---------|----------|
| 1     | 6.476     | 3451526 | 383999 | 100.000 | 100.000  |
| Total |           | 3451526 | 383999 | 100.000 | 100.000  |

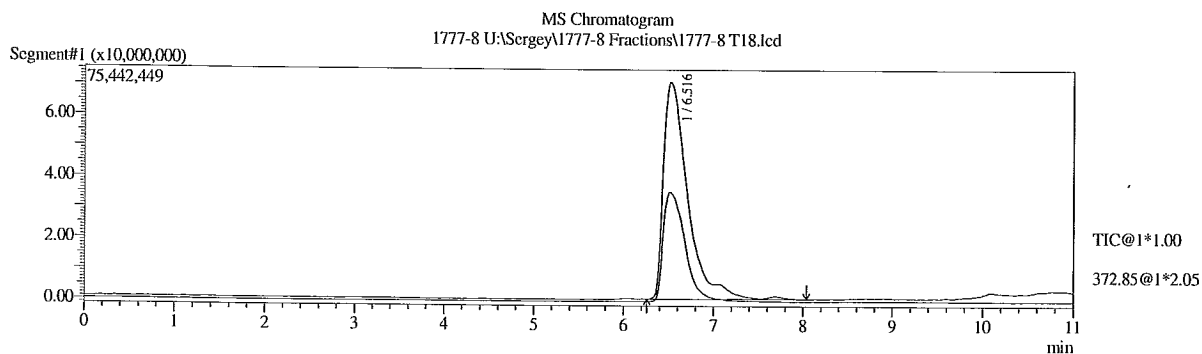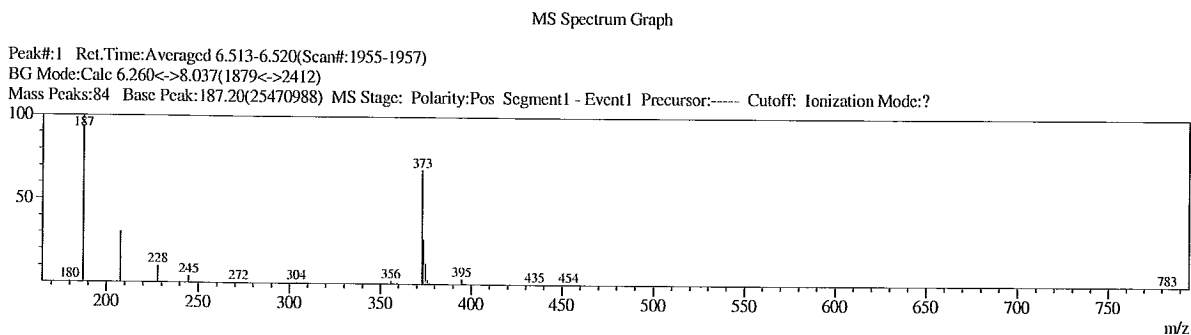

Date Acquired : 10/22/2009 4:54:34 PM  
 Sample Name : 1777-9  
 Sample ID : T4  
 Vial # : 99  
 Injection Volume : 5  
 Data File : 1777-9 T4.lcd  
 Method File : 6min 5-95, 1Min Clean(254)\_(214) COL1.lcm

Sample Information

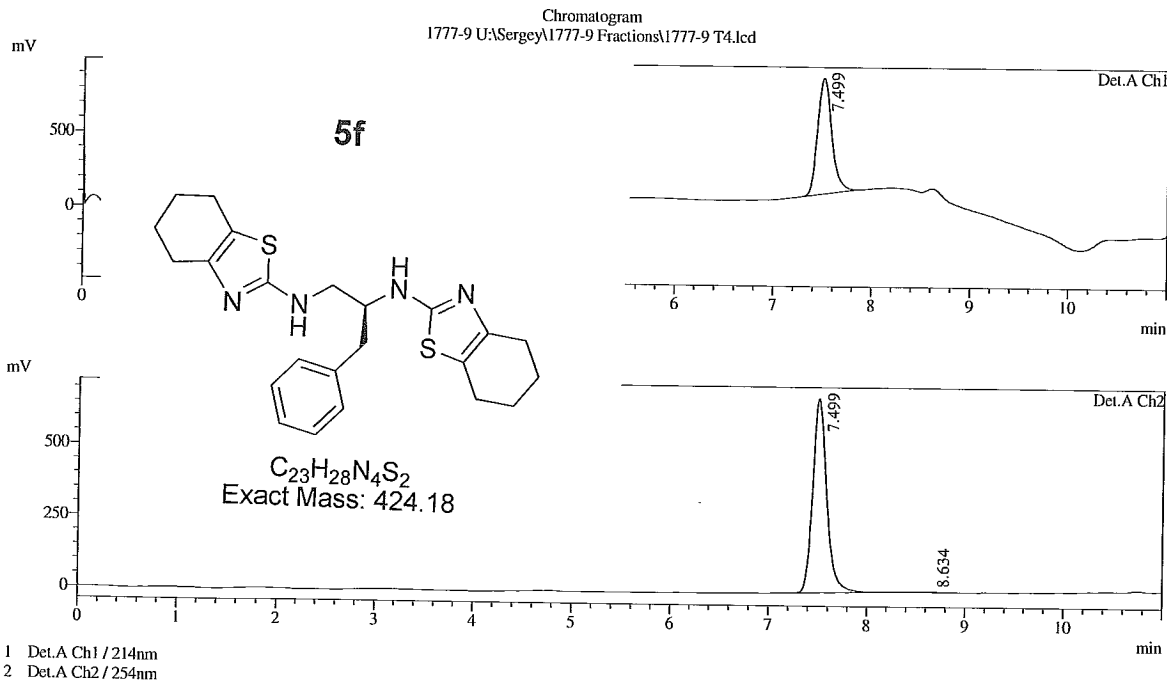

PeakTable  
 Detector A Ch1 214nm

| Peak# | Ret. Time | Area    | Height | Area %  | Height % |
|-------|-----------|---------|--------|---------|----------|
| 1     | 7.499     | 7750370 | 779023 | 100.000 | 100.000  |
| Total |           | 7750370 | 779023 | 100.000 | 100.000  |

PeakTable  
 Detector A Ch2 254nm

| Peak# | Ret. Time | Area    | Height | Area %  | Height % |
|-------|-----------|---------|--------|---------|----------|
| 1     | 7.499     | 6705539 | 677755 | 99.782  | 99.784   |
| 2     | 8.634     | 14621   | 1468   | 0.218   | 0.216    |
| Total |           | 6720160 | 679223 | 100.000 | 100.000  |

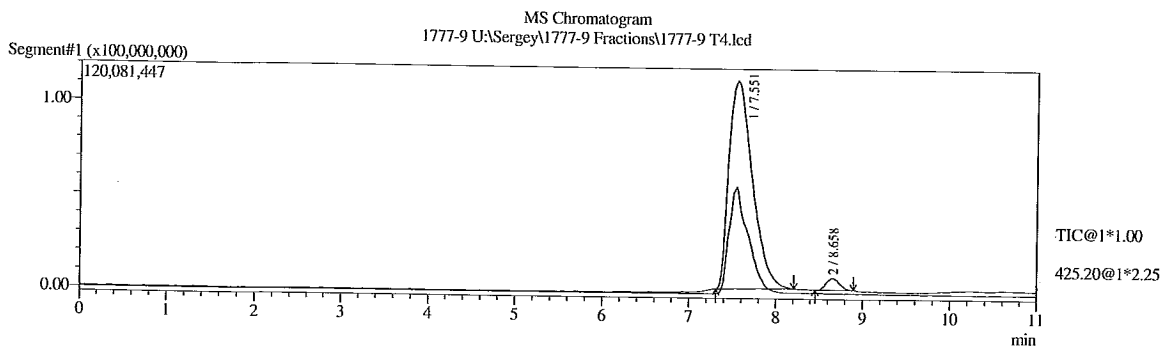

Peak#1 Ret. Time: Averaged 7.547-7.553(Scan#:2265-2267)  
 BG Mode: Calc 7.313<->8.207(2195<->2463)  
 Mass Peaks:201 Base Peak:425.20(30399953) MS Stage: Polarity:Pos Segment1 - Event1 Precursor:---- Cutoff: Ionization Mode:?

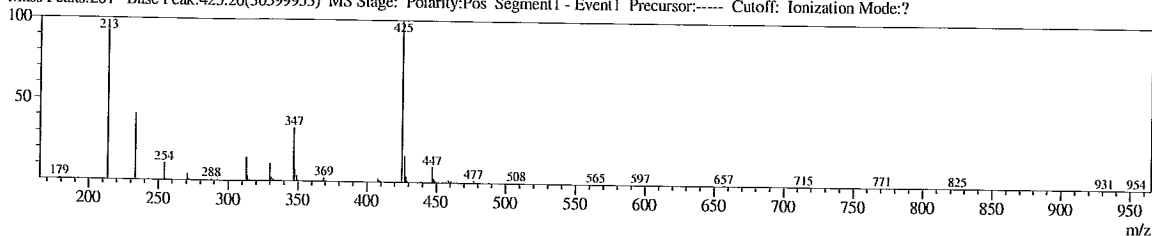

Date Acquired : 10/22/2009 5:44:44 PM  
 Sample Name : 1763-28  
 Sample ID : T36  
 Vial # : 103  
 Injection Volume : 5  
 Data File : 1763-28 T36.lcd  
 Method File : 6min 5-95,1Min Clean(254)\_(214) COL1.lcm

Sample Information

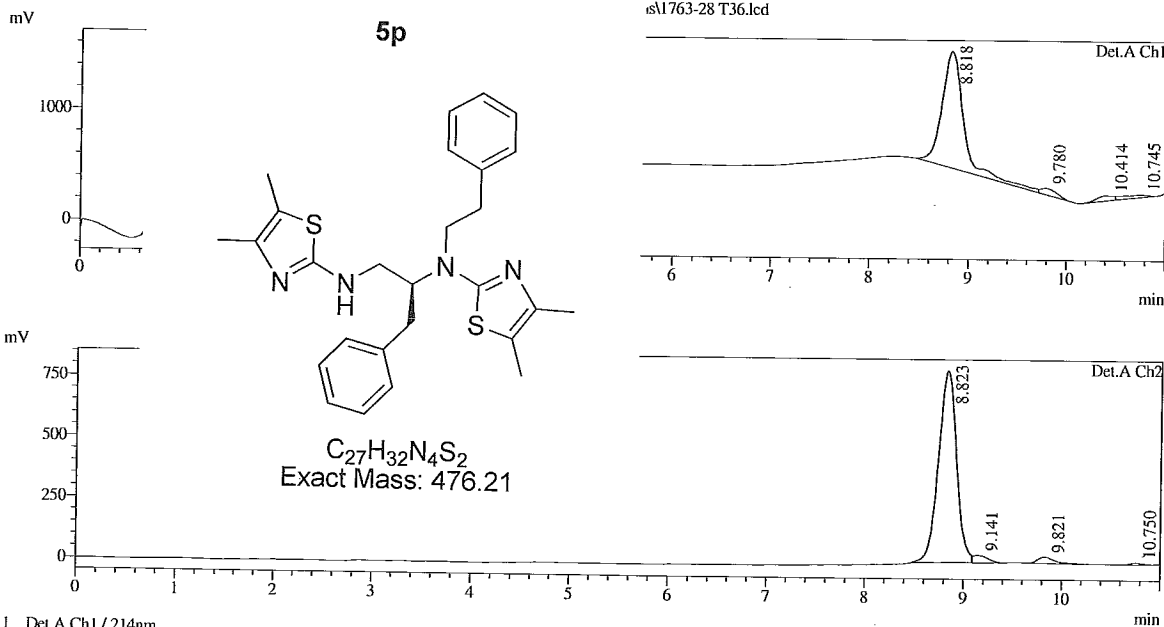

1 Det.A Ch1 / 214nm  
 2 Det.A Ch2 / 254nm

PeakTable  
 Detector A Ch1 214nm

| Peak# | Ret. Time | Area     | Height  | Area %  | Height % |
|-------|-----------|----------|---------|---------|----------|
| 1     | 8.818     | 15947484 | 1045796 | 90.295  | 89.635   |
| 2     | 9.780     | 642757   | 54242   | 3.639   | 4.649    |
| 3     | 10.414    | 569634   | 44157   | 3.225   | 3.785    |
| 4     | 10.745    | 501613   | 22531   | 2.840   | 1.931    |
| Total |           | 17661489 | 1166727 | 100.000 | 100.000  |

PeakTable  
 Detector A Ch2 254nm

| Peak# | Ret. Time | Area     | Height | Area %  | Height % |
|-------|-----------|----------|--------|---------|----------|
| 1     | 8.823     | 10067473 | 787345 | 93.370  | 92.315   |
| 2     | 9.141     | 335236   | 32163  | 3.109   | 3.771    |
| 3     | 9.821     | 318461   | 25697  | 2.954   | 3.013    |
| 4     | 10.750    | 61205    | 7685   | 0.568   | 0.901    |
| Total |           | 10782374 | 852890 | 100.000 | 100.000  |

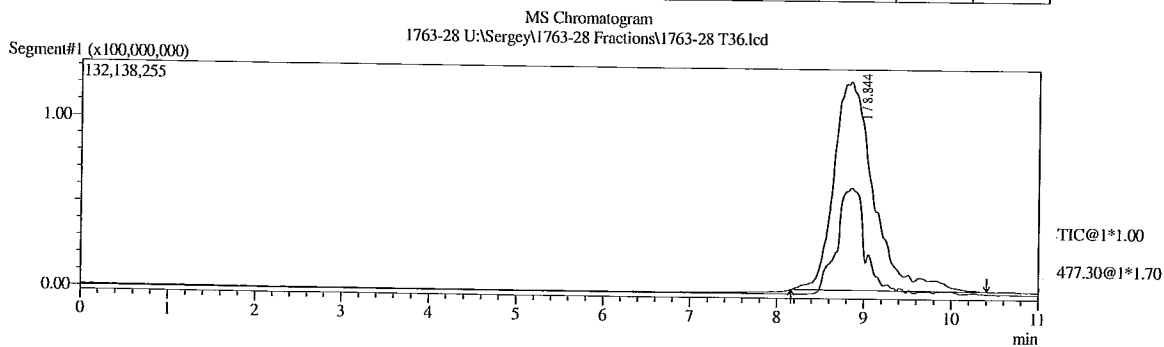

Peak#:1 Ret.Time: Averaged 8.840-8.847(Scan#:2653-2655)  
 BG Mode: Calc 8.163<->10.403(2450<->3122)  
 Mass Peaks: 309 Base Peak: 477.30(36574308) MS Stage: Polarity: Pos Segment1 - Event1 Precursor: ---- Cutoff: Ionization Mode: ?

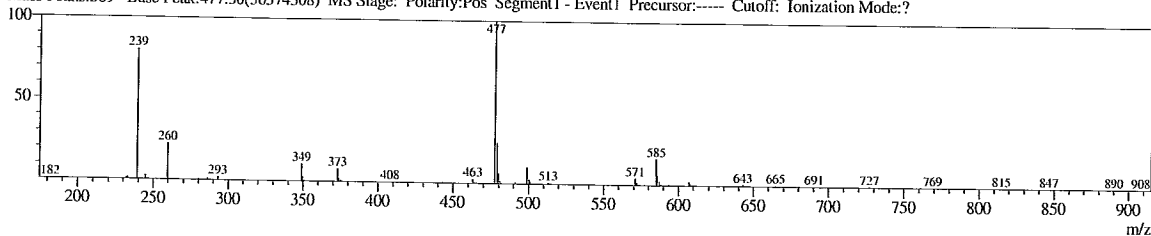

MS Peak Table TIC

| Peak# | Ret. Time | Peak Start | Peak End | Area       | Area%  | Height    | Height% | A/H   | Mark | Name | ID# | Event# |
|-------|-----------|------------|----------|------------|--------|-----------|---------|-------|------|------|-----|--------|
| 1     | 8.844     | 8.163      | 10.403   | 3864727545 | 100.00 | 122596051 | 100.00  | 31.52 | S    |      |     | 1-1    |
| Total |           |            |          | 3864727545 | 100.00 | 122596051 | 100.00  |       |      |      |     |        |

Printing Date: Tuesday, October 27, 2009  
Polarity/Scan Type: Positive Q1 Scan

Sample Name: 1777-8 0905TPIM.995A

+Q1: 12 MCA scans from Sample 1 (1777-8 0905TPIM:995A) of TPIM0910....

Max: 5.1e7 cps

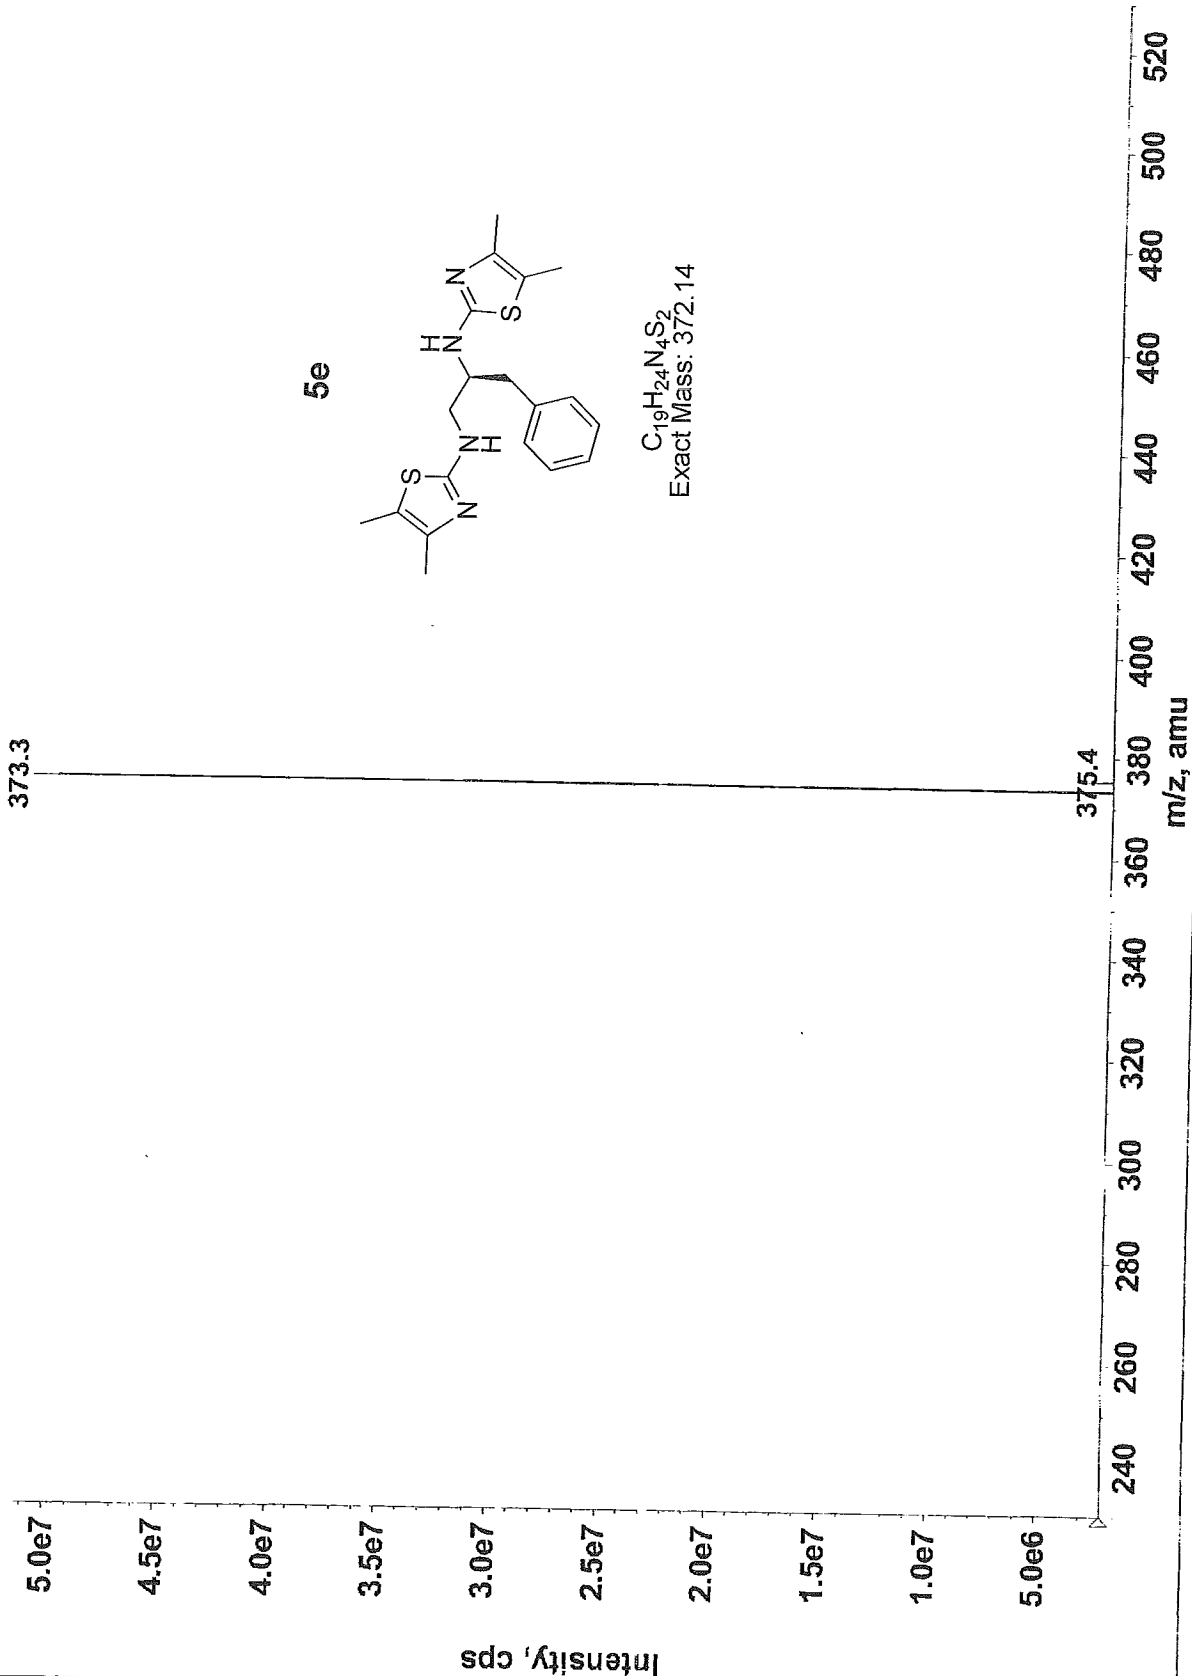

0905TPIM.995A, 1777-8, DMSO, H-1, NUMEGA 10-27-09

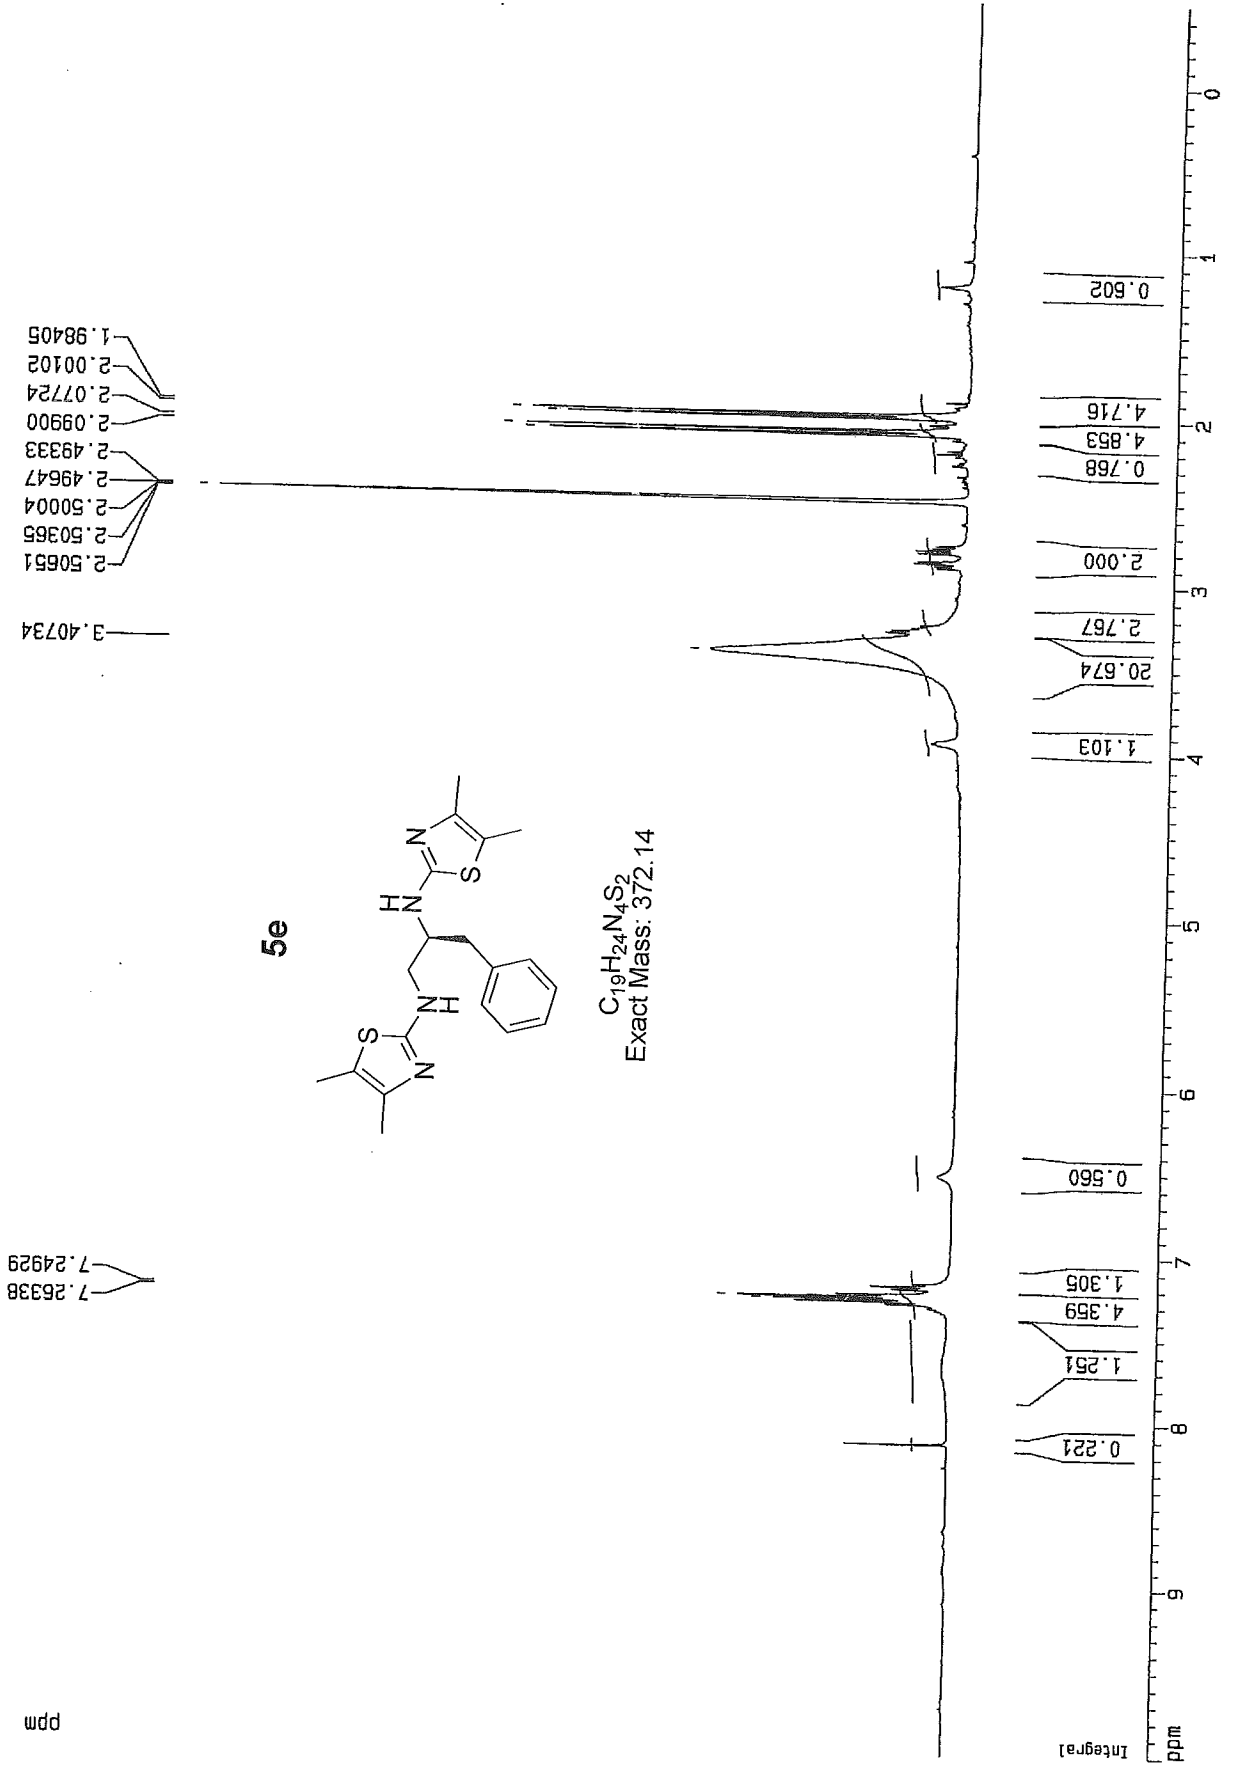



Printing Date: Tuesday, October 27, 2009  
Polarity/Scan Type: Positive Q1 Scan

Sample Name: 1777-9 0905TPIM.955B

+Q1 12 MCA scans from Sample 3 (1777-9 0905TPIM.955B) of TPIM0910.... Max 2.0e8 cps.

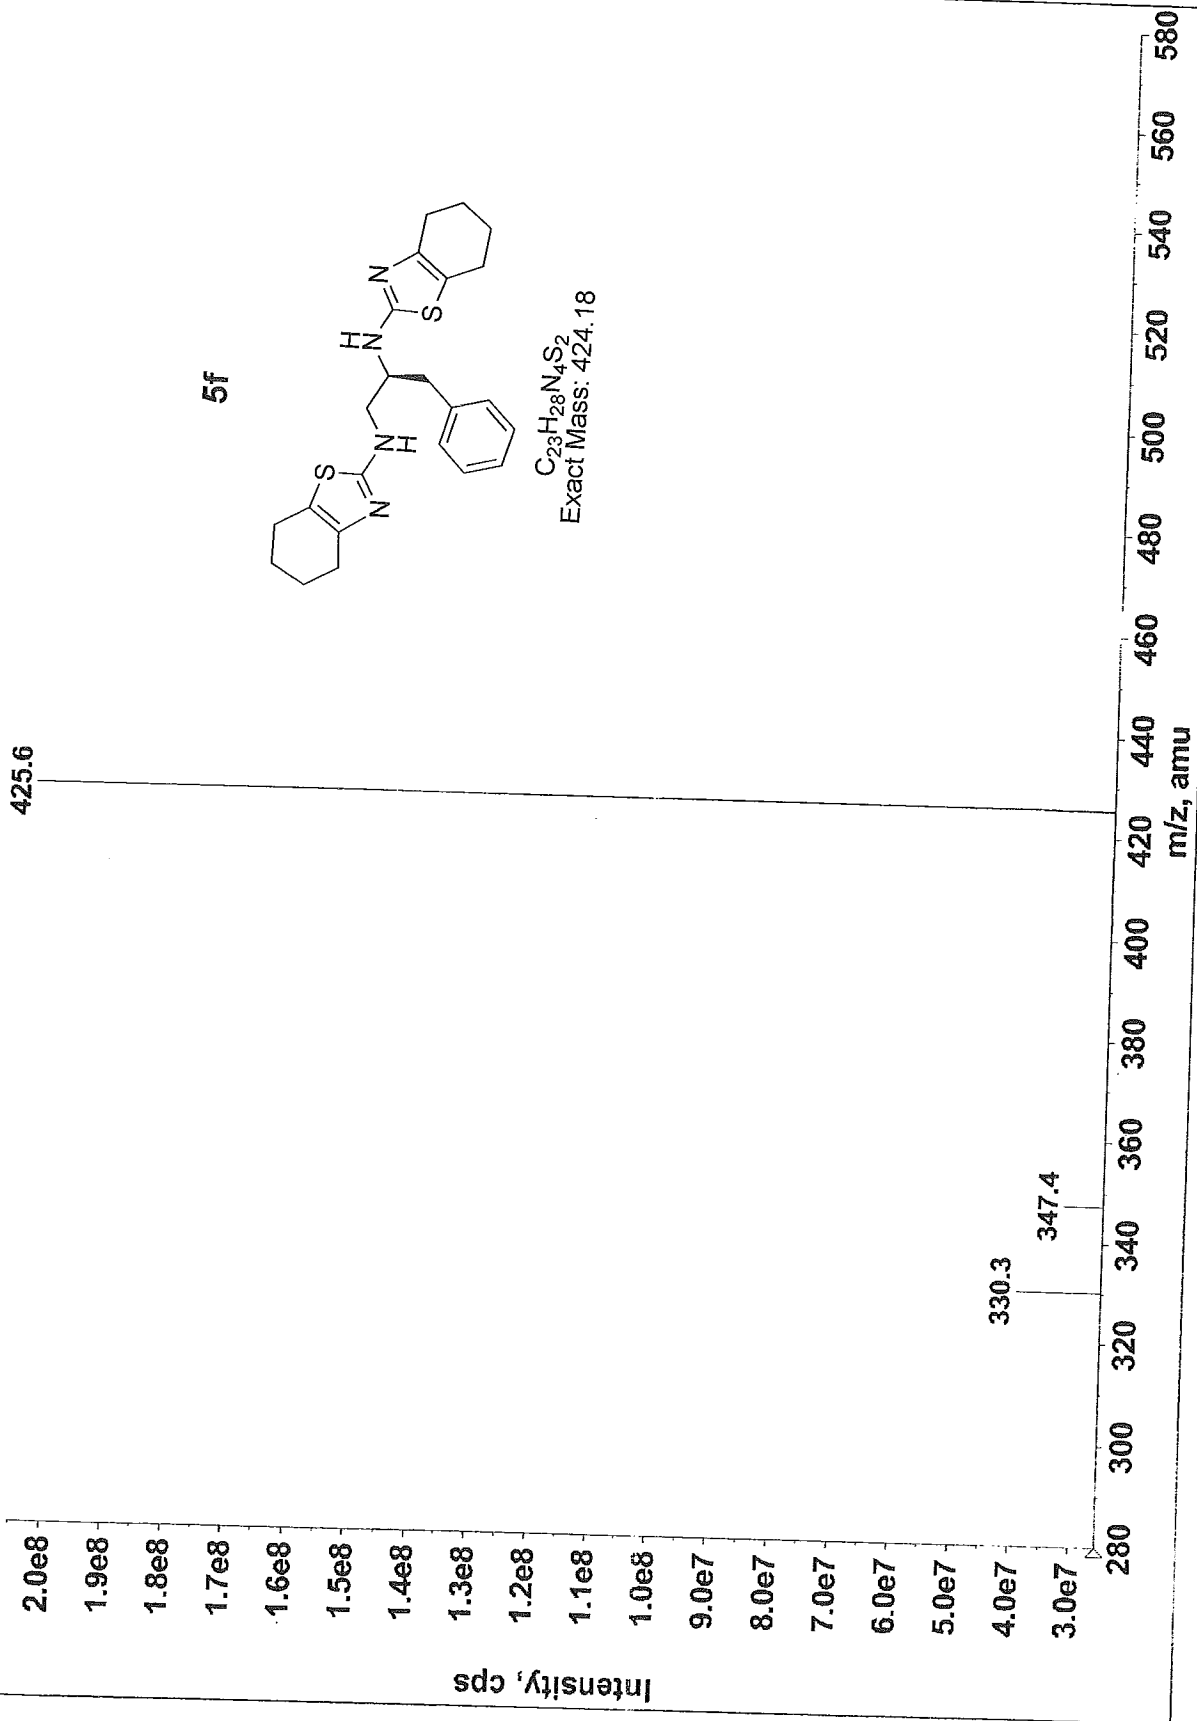

0905TPIM.995B, 1777-9, DMSO, H-1, NUMEGA 10-27-09

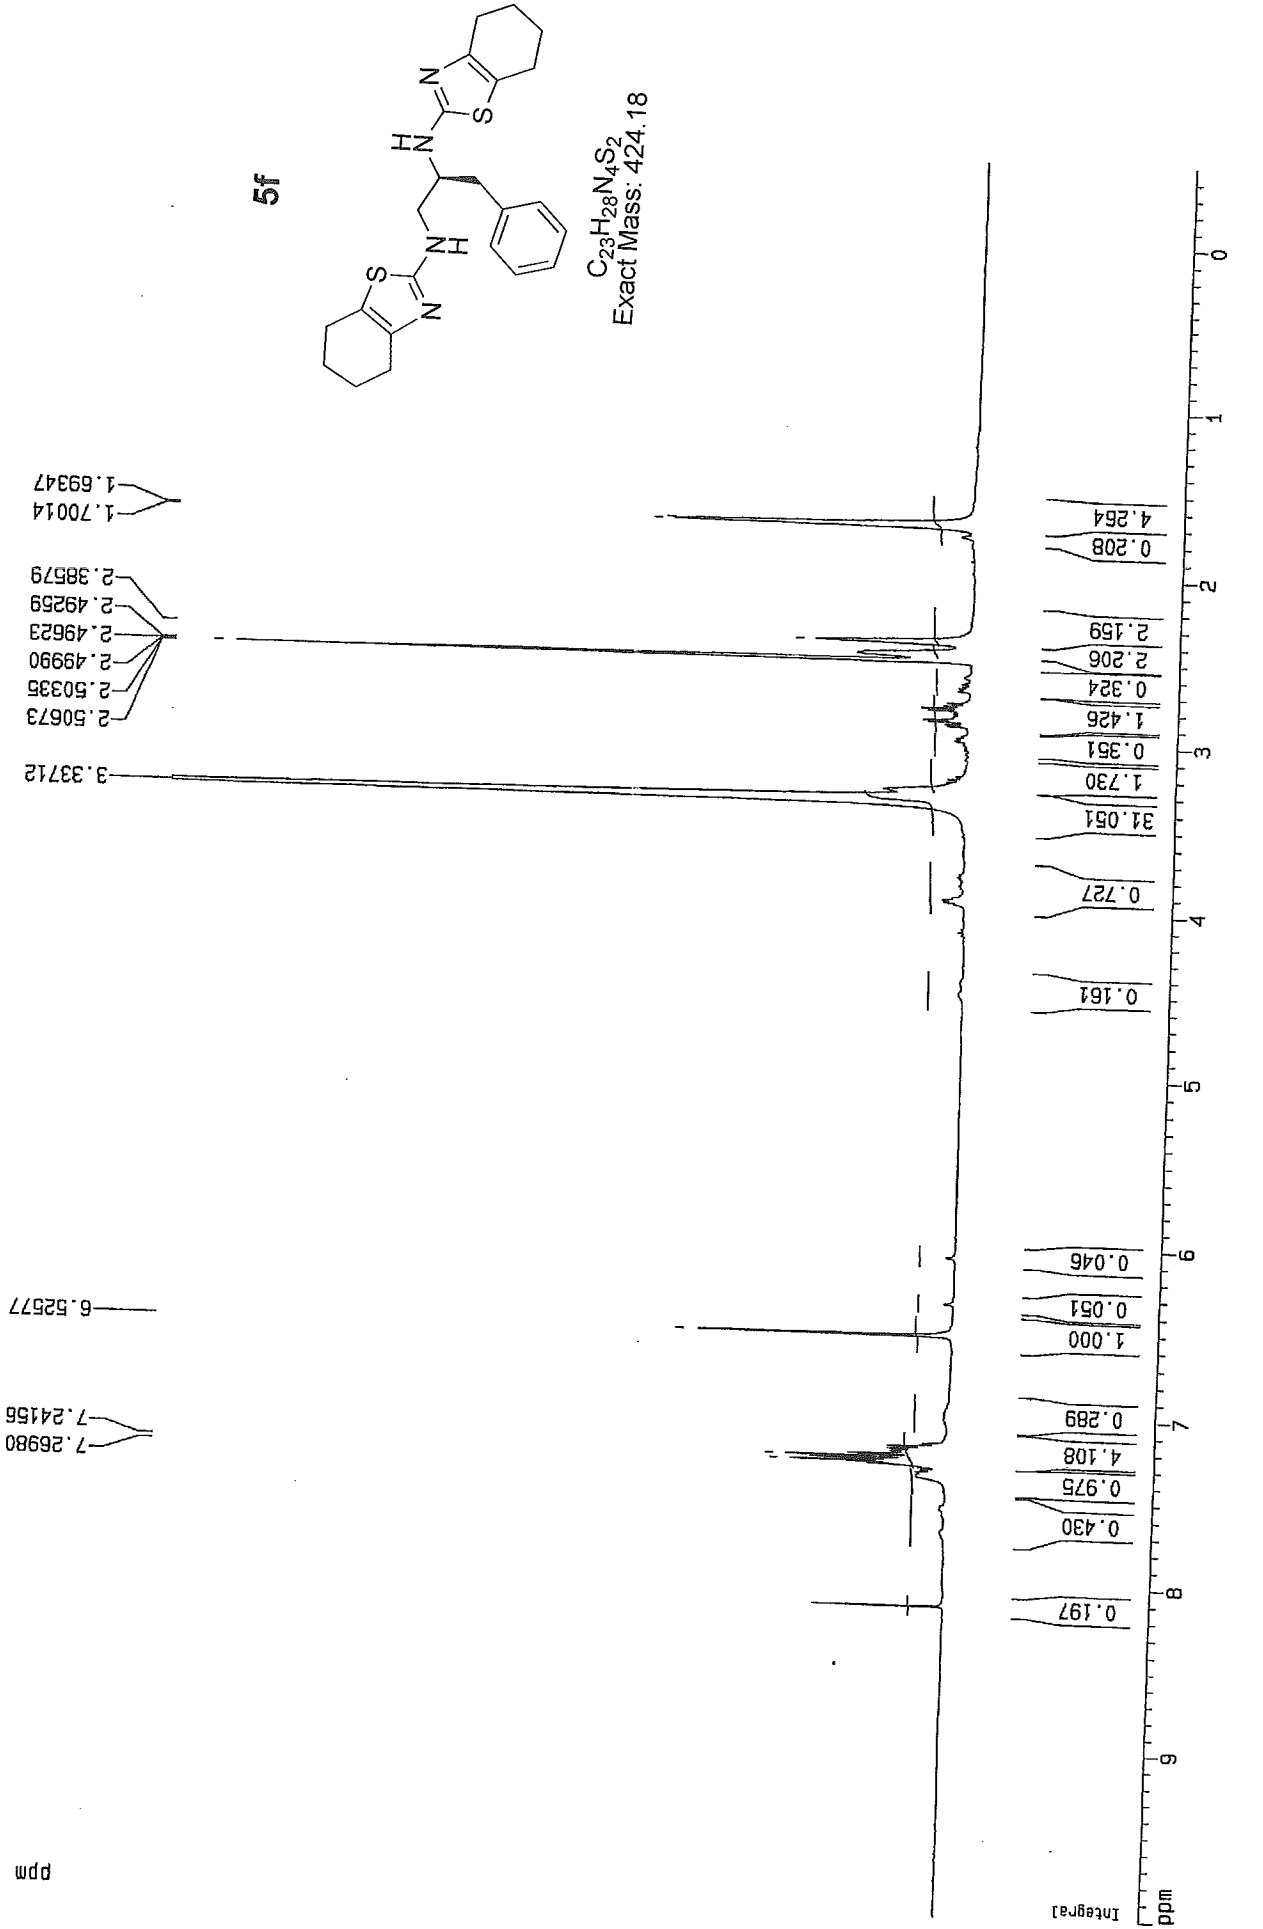

RECEIVED 10/30/2009 19:27

Printing Date: Tuesday, October 27, 2009  
Polarity/Scan Type: Positive Q1 Scan

Sample Name: 1763-28

+Q1: 12 MCA scans from Sample 5 (1763-28: 0905TPIM995C) of TPIM0910... Max: 2.3e8 cps

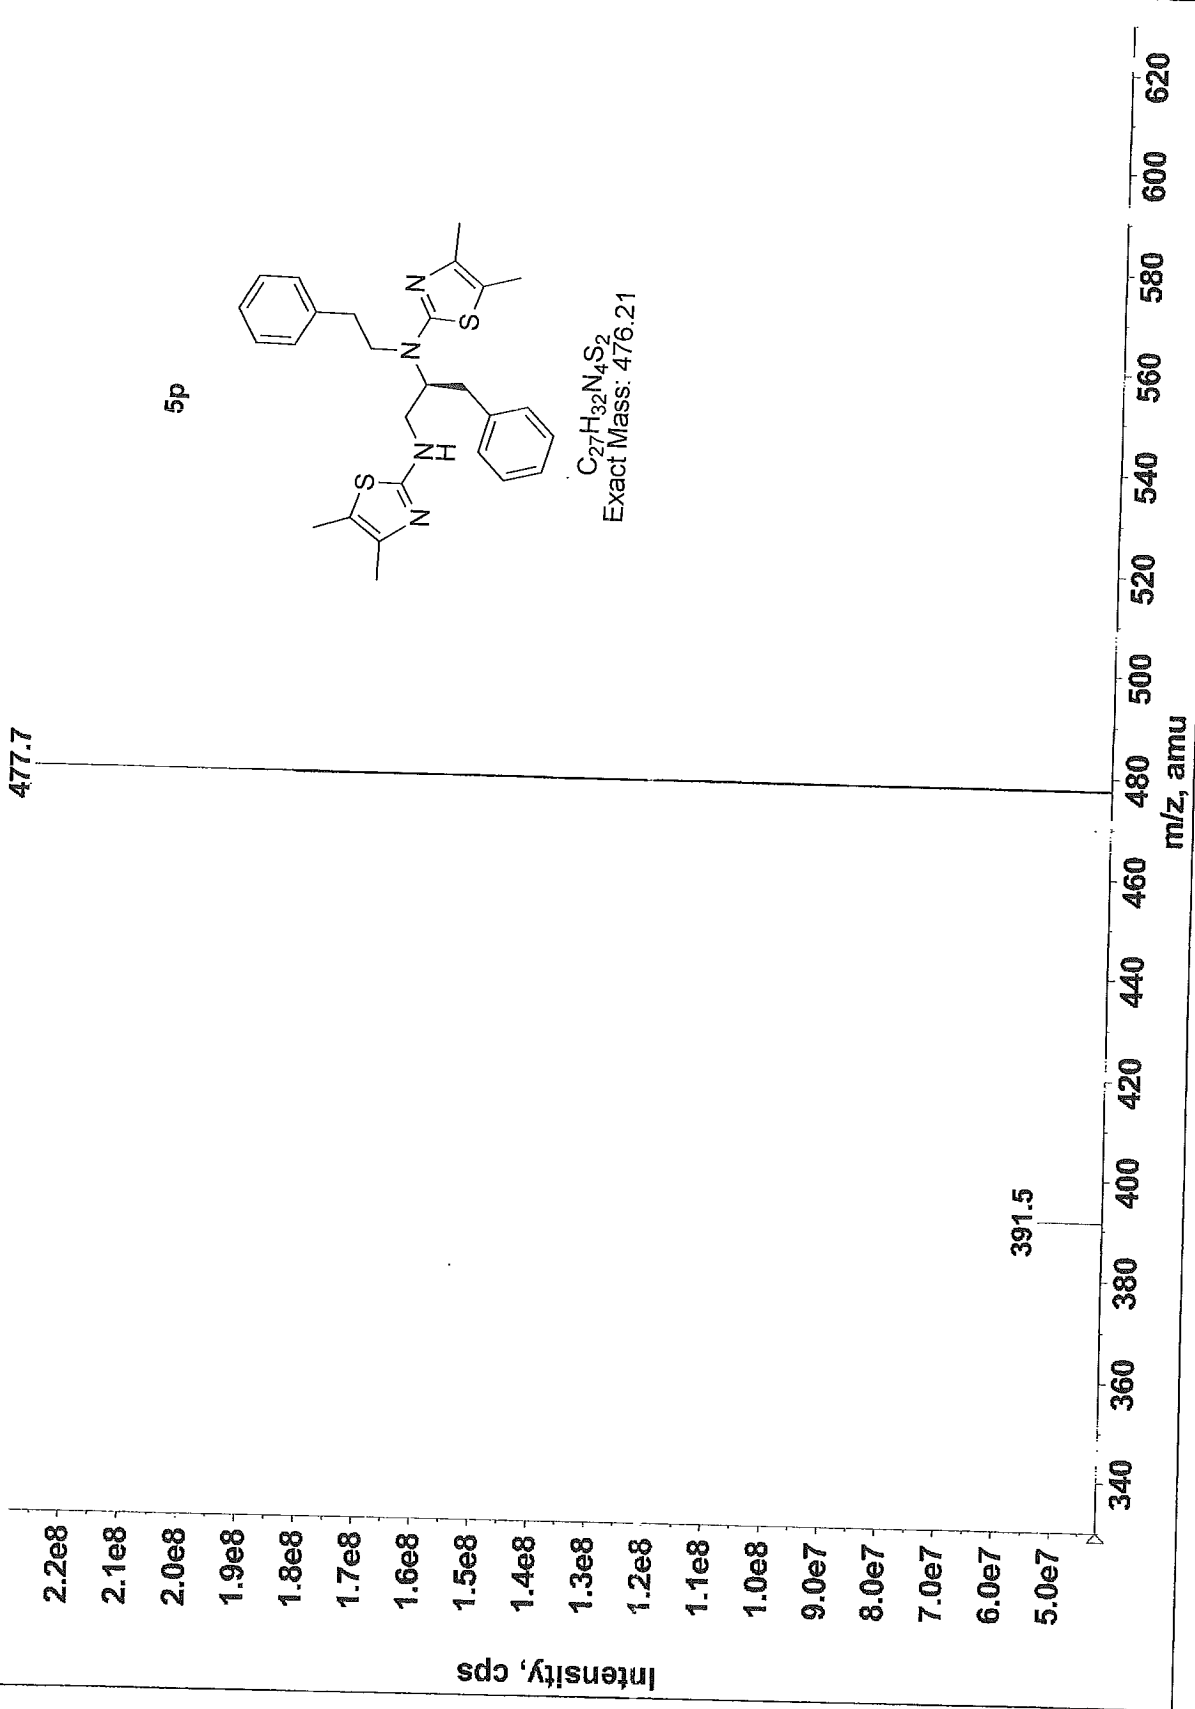

0905TPIM.995C, 1763-28, DMSO, H-1, NUMEGA 10-27-09

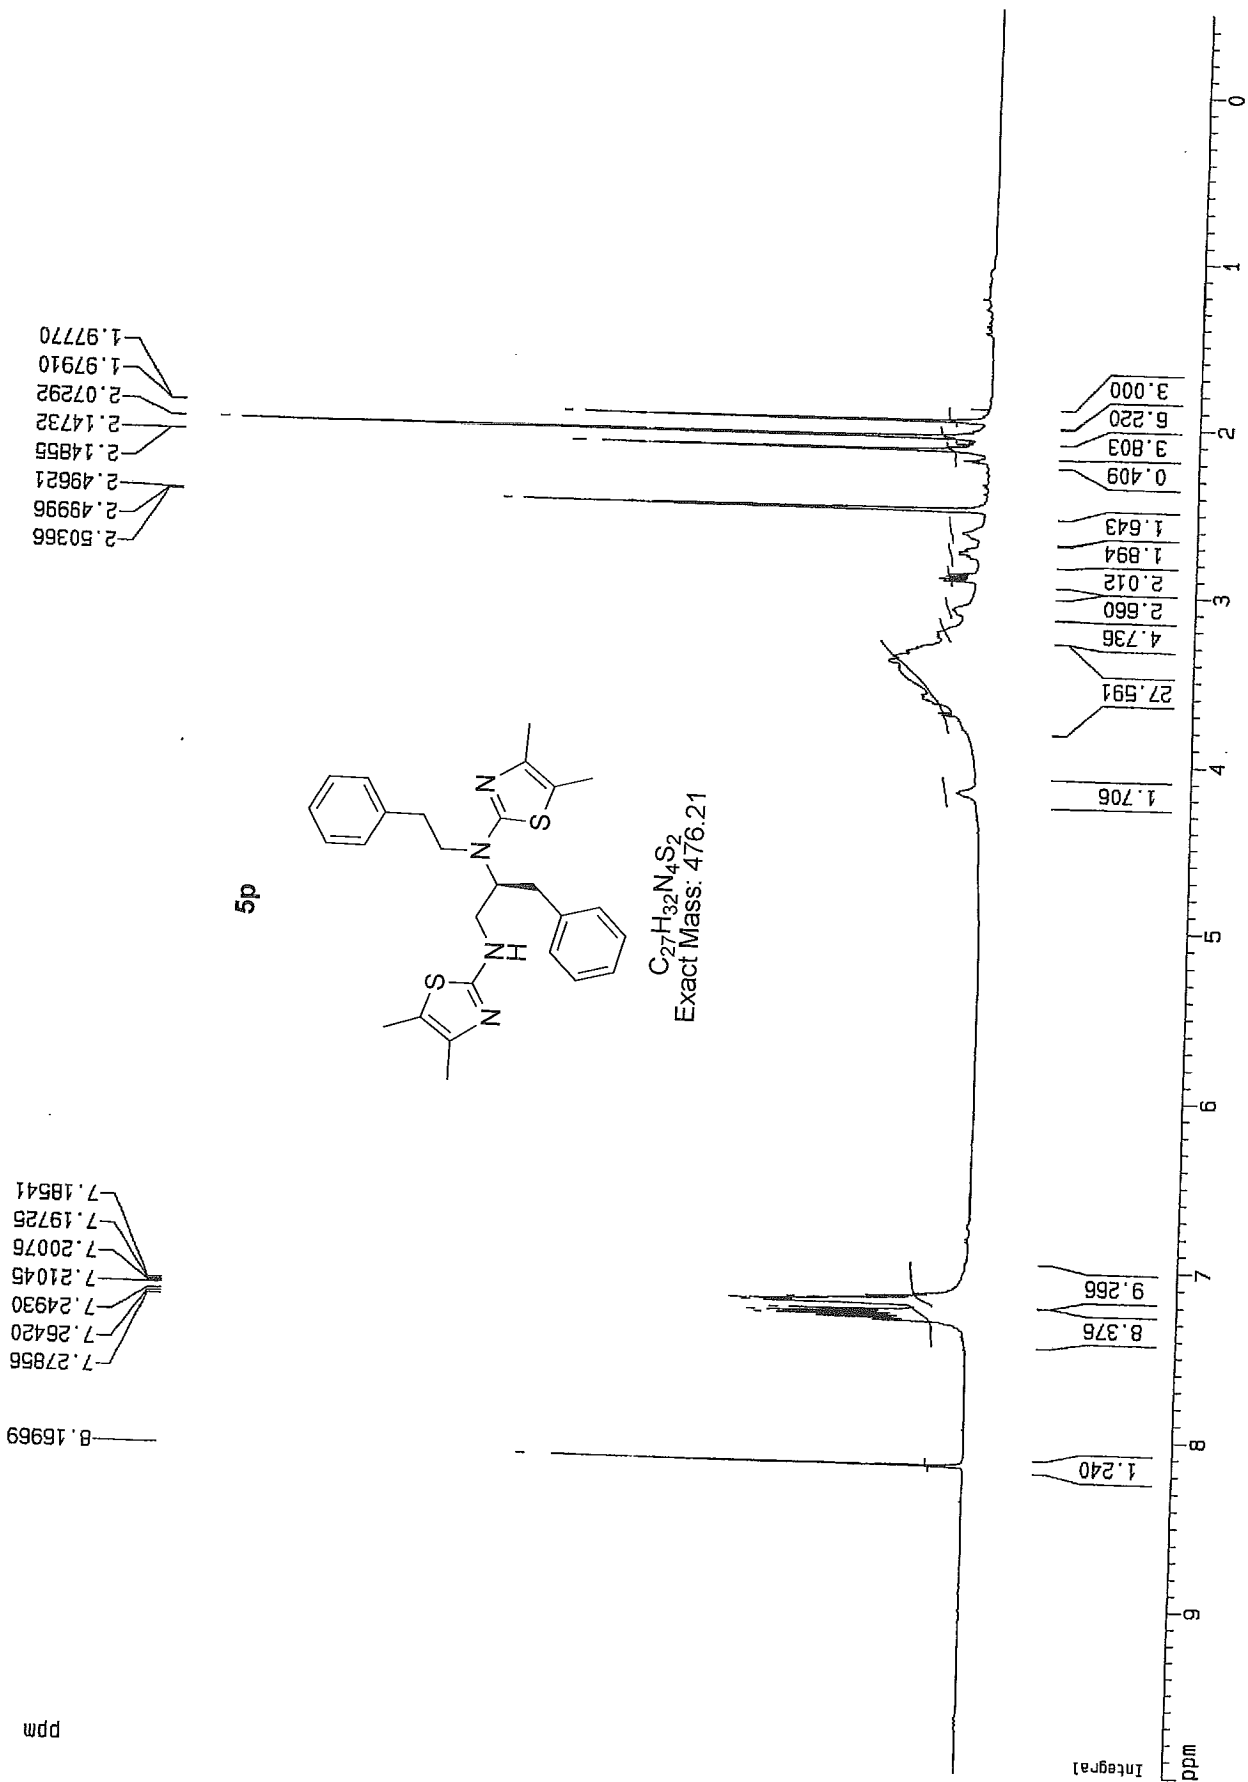

RECEIVED 10/30/2009 19:27

Date Acquired : 12/3/2  
 Sample Name : PT-1 F  
 Sample ID : T4  
 Vial # : 13  
 Injection Volume : 5  
 Data File : PT-1 F  
 Method File : 6min 5

PT-1

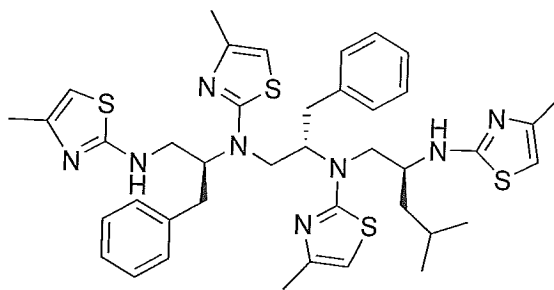

$C_{40}H_{50}N_8S_4$   
 Exact Mass: 770.30

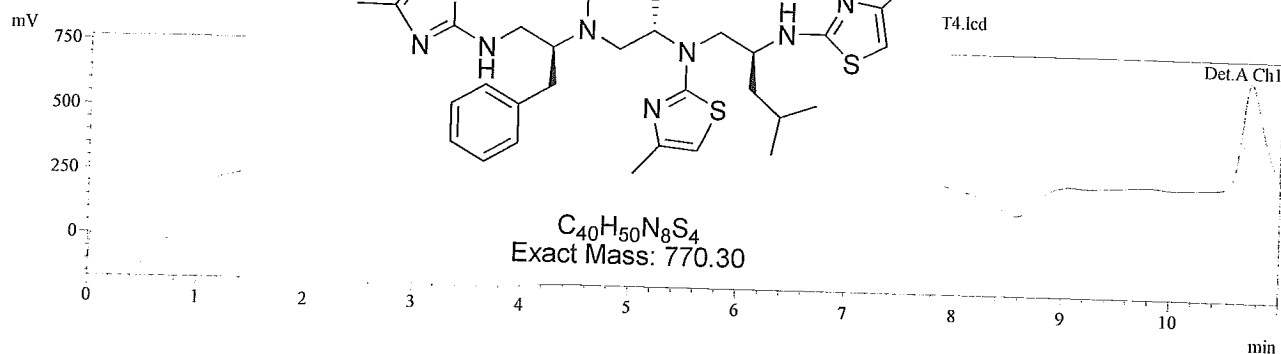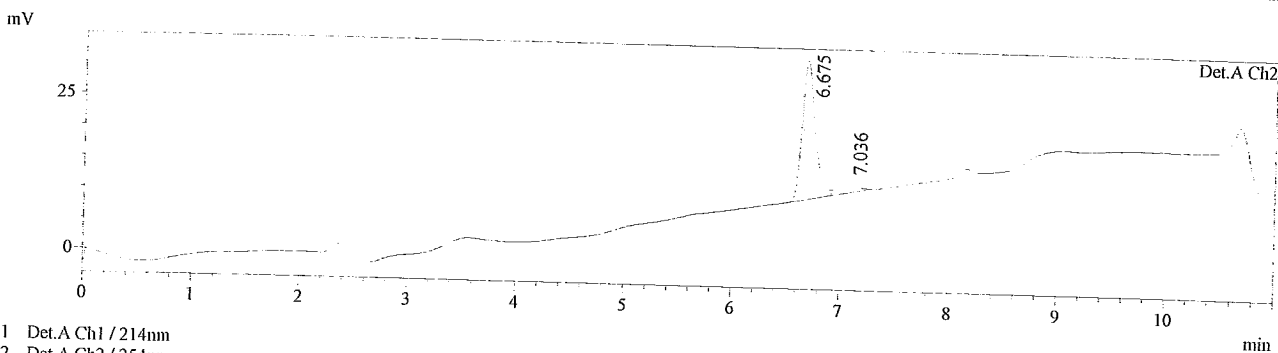

1 Det.A Ch1 / 214nm  
 2 Det.A Ch2 / 254nm

PeakTable

| Detector A Ch2 254nm |           |        |        |         |          |
|----------------------|-----------|--------|--------|---------|----------|
| Peak#                | Ret. Time | Area   | Height | Area %  | Height % |
| 1                    | 6.675     | 187937 | 22166  | 89.187  | 91.122   |
| 2                    | 7.036     | 22785  | 2160   | 10.813  | 8.878    |
| Total                |           | 210722 | 24326  | 100.000 | 100.000  |

MS Chromatogram

PT-1 Run2 LALCMS2 - Instrument Data\Shared\Sergey\PT\PT-1 Fractions\PT-1 Run2 T4.lcd

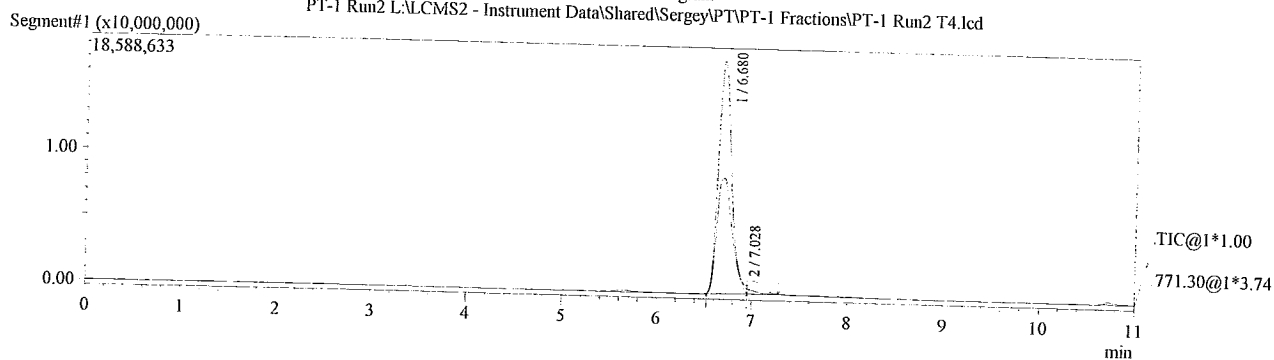

MS Spectrum Graph

Peak#:1 Ret.Time:Averaged 6.677-6.683(Scan#:2004-2006)

BG Mode:Calc 6.527<->6.950(1959<->2086)

Mass Peaks:57 Base Peak:386.45(12208541) MS Stage: Polarity:Pos Segment1 - Event1 Precursor: Cutoff: Ionization Mode:\$ionizationMode\$

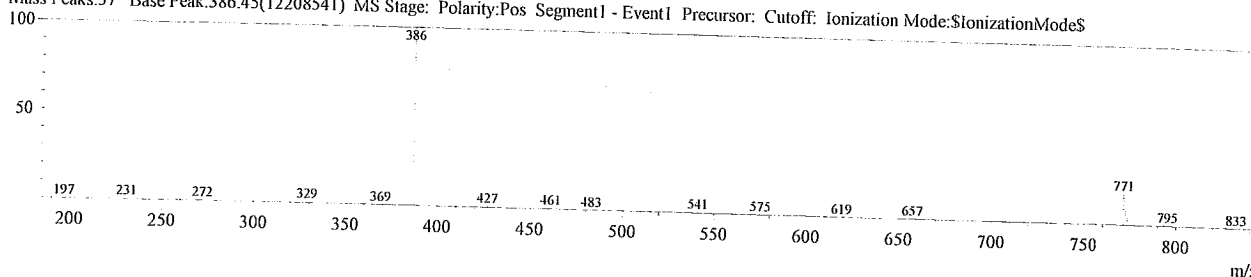

Date Acquired : 12/4/2009 12:40:31 PM  
 Sample Name : PT-2  
 Sample ID : Pure MW 787 pooled002  
 Injection Volume : 5  
 Data File : PT-2 pure MW 787 pooled.lcd  
 Method File : 6 min 5-95 D2only, 2Min Clean\_05NOV09.1cm

Sample Information

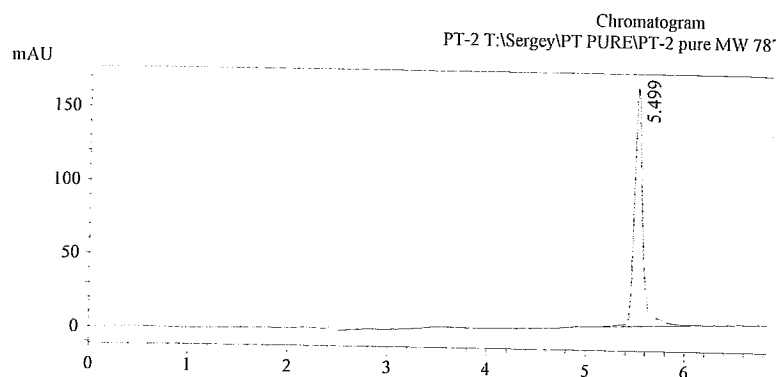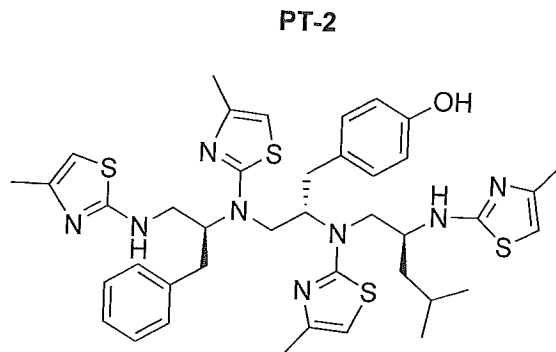

$C_{40}H_{50}N_8OS_4$   
 Exact Mass: 786.30

1 PDA Multi 1 / 254nm 4nm

PDA Ch1 254nm 4nm PeakTable

| Peak# | Ret. Time | Area   | Height | Area %  | Height % |
|-------|-----------|--------|--------|---------|----------|
| 1     | 5.499     | 937440 | 161306 | 100.000 | 100.000  |
| Total |           | 937440 | 161306 | 100.000 | 100.000  |

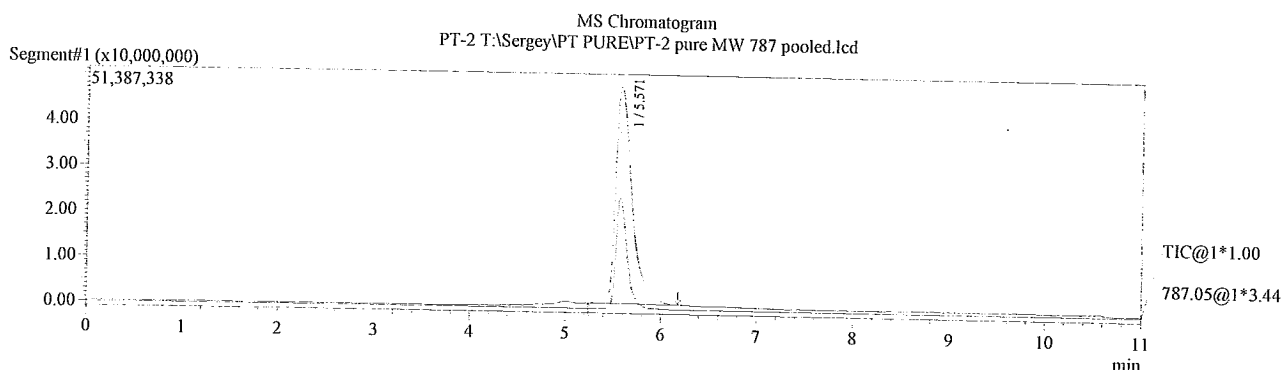

MS Spectrum Graph

Peak#:1 Ret.Time:Averaged 5.567-5.573(Scan#:1671-1673)  
 BG Mode:Calc 5.240<->6.180(1573<->1855)

Mass Peaks:502 Base Peak:394.35(30725563) MS Stage: Polarity:Pos Segment1 - Event1 Precursor: Cutoff: Ionization Mode:

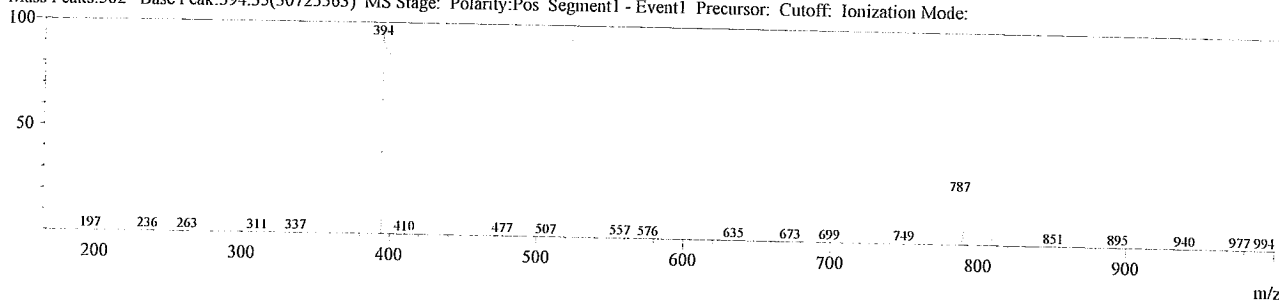

MS Peak Table TIC

| Peak# | Ret.Time | Peak Start | Peak End | Area      | Area%  | Height   | Height% | A/H   | Mark | Name | ID# | Event# |
|-------|----------|------------|----------|-----------|--------|----------|---------|-------|------|------|-----|--------|
| 1     | 5.571    | 5.240      | 6.180    | 566144061 | 100.00 | 47507950 | 100.00  | 11.91 |      |      |     |        |
| Total |          |            |          | 566144061 | 100.00 | 47507950 | 100.00  |       |      |      |     | 1-1    |

**Sample Information**  
 Date Acquired : 12/2/2009 5:54:51 PM  
 Sample Name : Sergey  
 Sample ID : PT-3Run1 T0  
 Injection Volume : 5  
 Data File : PT-3 Run1 T0.lcd  
 Method File : 6 min 5-95 D2only, 2Min Clean\_05NOV09.lcm

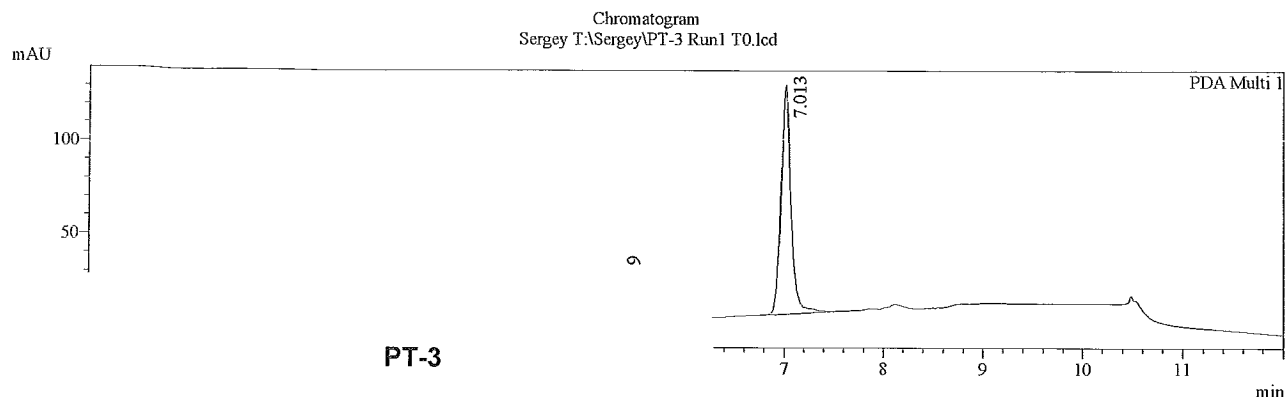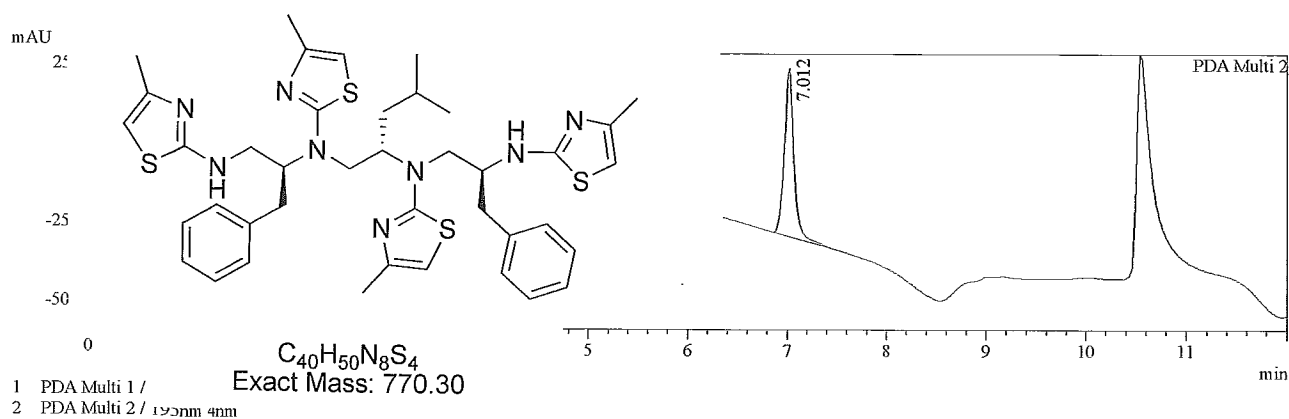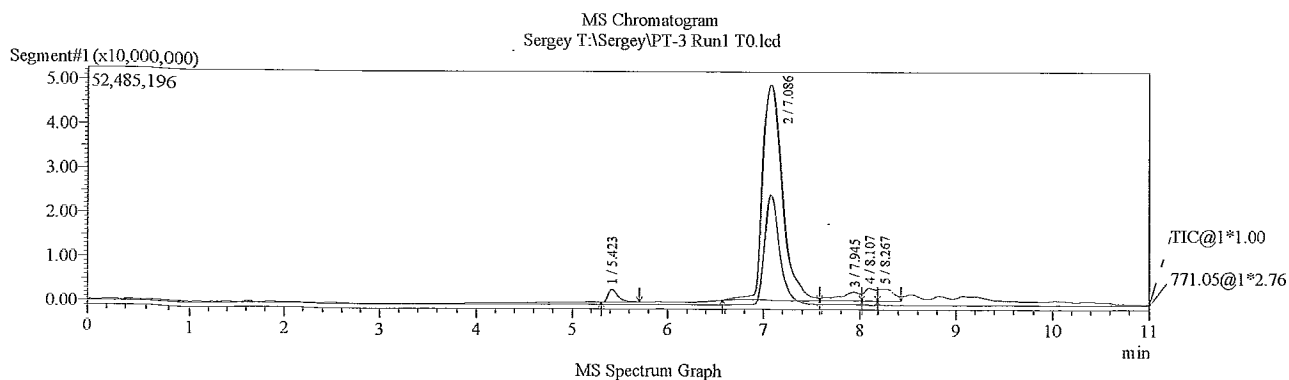

Peak#: 2 Ret. Time: Averaged 7.083-7.090(Scan#:2126-2128)  
 BG Mode: Calc 6.573<->7.583(1973<->2276)  
 Mass Peaks: 417 Base Peak: 386.30(27995246) MS Stage: Polarity: Pos Segment1 - Event1 Precursor: Cutoff: Ionization Mode:

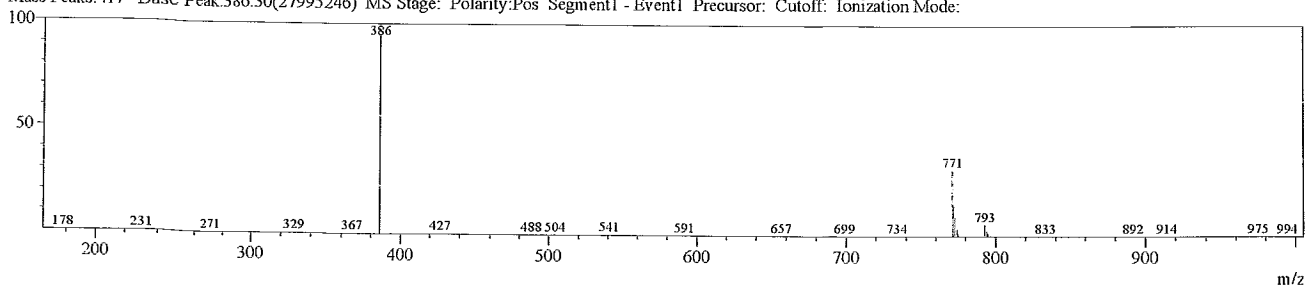

Date Acquired : 12/4/2009 12:53:04 PM  
 Sample Name : PT-4  
 Sample ID : Pure MW 737 pooled003  
 Injection Volume : 5  
 Data File : PT-4 pure MW 737 pooled003.lcd  
 Method File : 6 min 5-95 D2only, 2Min Clean\_05NOV09.lcm

Sample Information

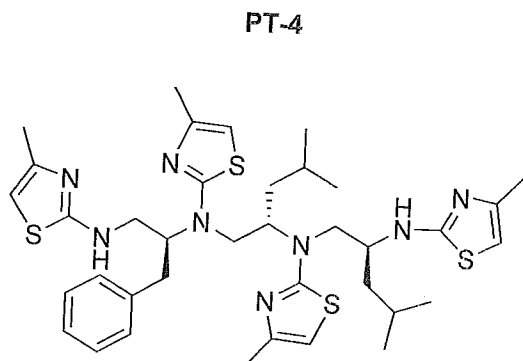

$C_{37}H_{52}N_8S_4$   
 Exact Mass: 736.32

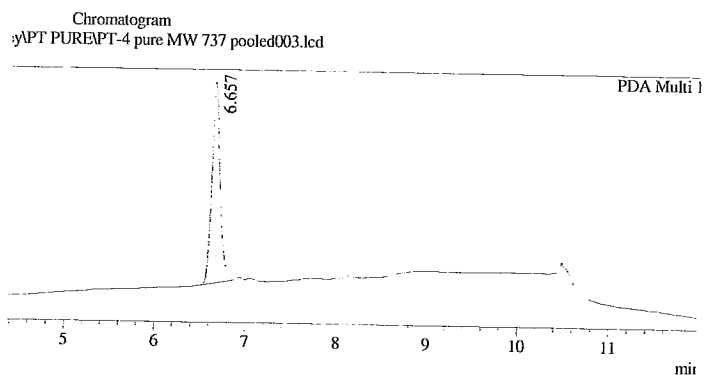

PeakTable

| Area   | Height | Area %  | Height % |
|--------|--------|---------|----------|
| 504738 | 79873  | 100.000 | 100.000  |
| 504738 | 79873  | 100.000 | 100.000  |

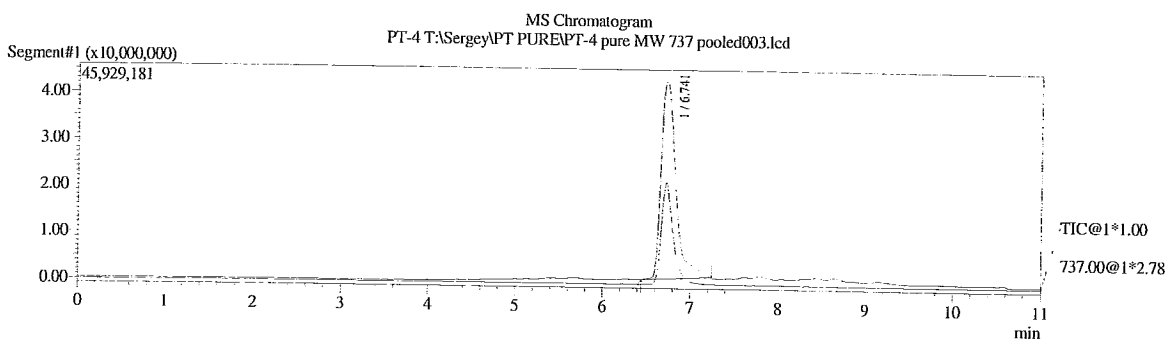

MS Spectrum Graph

Peak#:1 Ret.Time:Averaged 6.737-6.743(Scan#:2022-2024)  
 BG Mode:Calc 6.440<->7.240(1933<->2173)  
 Mass Peaks:446 Base Peak:369.30(25806461) MS Stage: Polarity:Pos Segment1 - Event1 Precursor: Cutoff: Ionization Mode:

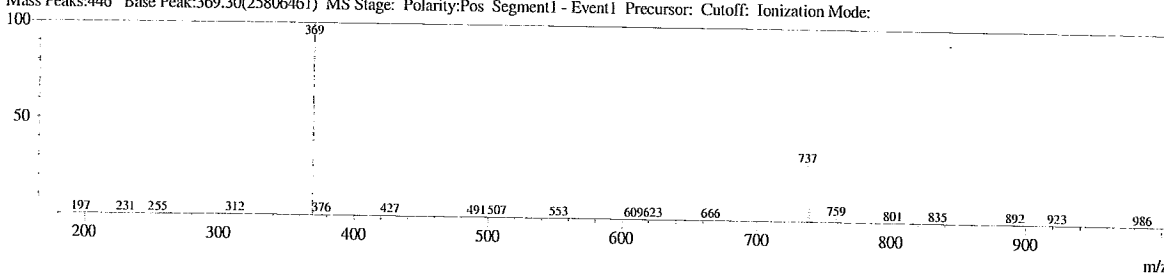

MS Peak Table TIC

| Peak# | Ret.Time | Peak Start | Peak End | Area      | Area%  | Height   | Height% | A/H   | Mark | Name | ID# | Event# |
|-------|----------|------------|----------|-----------|--------|----------|---------|-------|------|------|-----|--------|
| 1     | 6.741    | 6.440      | 7.240    | 494329917 | 100.00 | 40725889 | 100.00  | 12.13 |      |      |     |        |
| Total |          |            |          | 494329917 | 100.00 | 40725889 | 100.00  |       |      |      |     | 1-1    |



Date Acquired : 12/15/2009 2:13:54 PM  
 Sample Name : PT-5 repure  
 Sample ID : MW 821 T9  
 Vial # : 94  
 Injection Volume : 5  
 Data File : PT-5 repure MW 821 T9.lcd  
 Method File : 6min 5-95,1Min Clean(254)\_(205) COL1.lcm

Sample Information

Chromatogram  
 PT-5 repure U:\Sergey\PT\PT-5 Fractions\PT-5 repure MW 821 T9.lcd

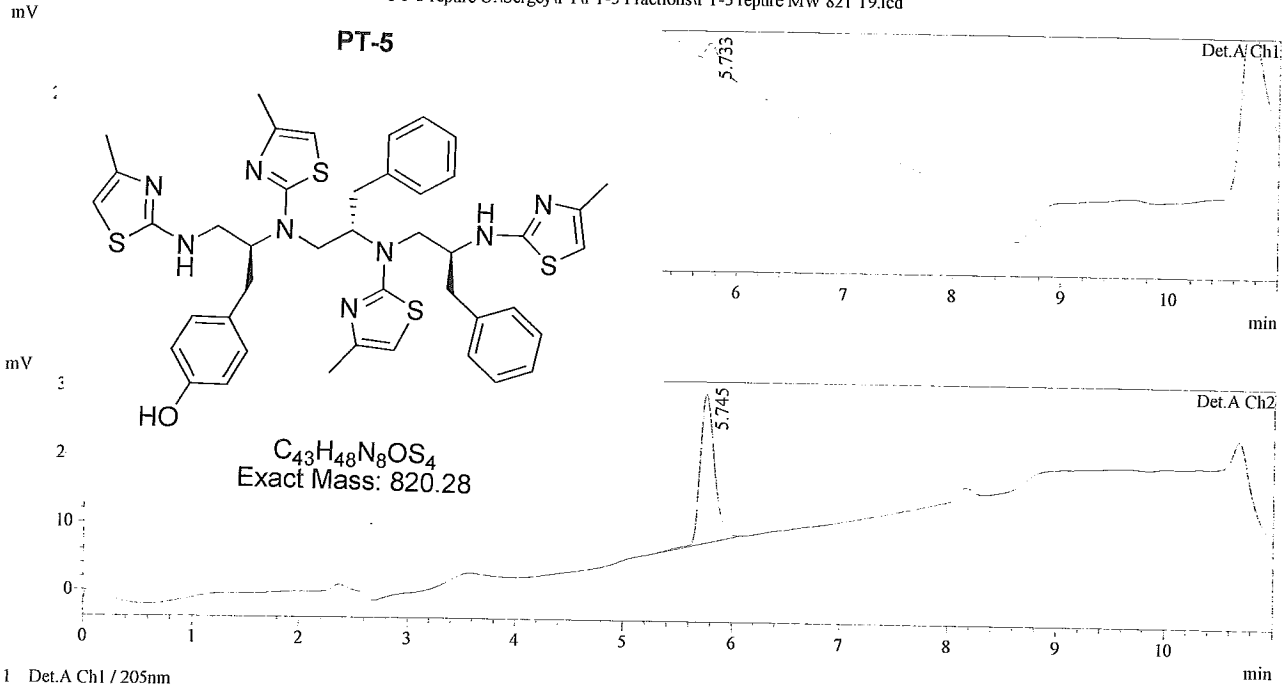

1 Det.A Ch1 / 205nm  
 2 Det.A Ch2 / 254nm

PeakTable

| Peak# | Ret. Time | Area   | Height | Area %  | Height % |
|-------|-----------|--------|--------|---------|----------|
| 1     | 5.733     | 366314 | 43688  | 100.000 | 100.000  |
| Total |           | 366314 | 43688  | 100.000 | 100.000  |

PeakTable

| Peak# | Ret. Time | Area   | Height | Area %  | Height % |
|-------|-----------|--------|--------|---------|----------|
| 1     | 5.745     | 198366 | 21872  | 100.000 | 100.000  |
| Total |           | 198366 | 21872  | 100.000 | 100.000  |

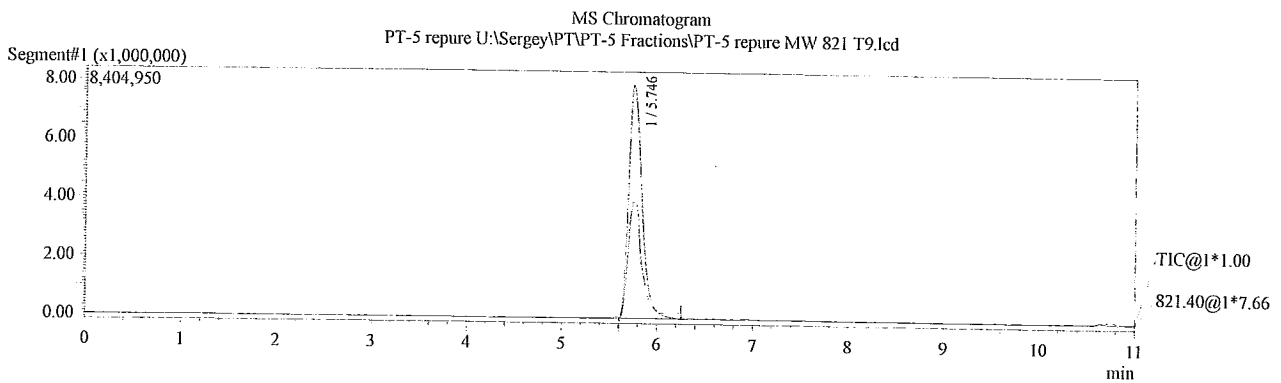

MS Spectrum Graph

Peak#:1 Ret.Time:Averaged 5.743-5.750(Scan#:1724-1726)  
 BG Mode:Calc 5.607<->6.253(1683<->1877)

Mass Peaks:42 Base Peak:411.55(5153607) MS Stage: Polarity:Pos Segment1 - Event1 Precursor:---- Cutoff: Ionization Mode:?

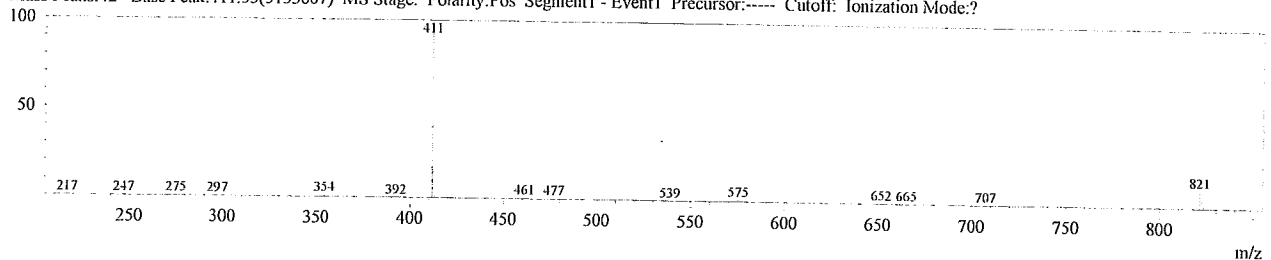

MS Peak Table TIC

| Peak# | Ret.Time | Peak Start | Peak End | Area     | Area%  | Height  | Height% | A/H  | Mark | Name | ID# | Event# |
|-------|----------|------------|----------|----------|--------|---------|---------|------|------|------|-----|--------|
| 1     | 5.746    | 5.607      | 6.253    | 76234559 | 100.00 | 7937463 | 100.00  | 9.60 | SV   |      |     |        |
| Total |          |            |          | 76234559 | 100.00 | 7937463 | 100.00  |      |      |      |     |        |

Date Acquired : 12/4/2009 4:12:04 PM  
 Sample Name : PT-6 PURE  
 Sample ID : MW 787 pooled002  
 Vial # : 12  
 Injection Volume : 5  
 Data File : PT-6 Pure MW 787 pooled.lcd  
 Method File : 6min 5-95,1Min Clean(254)\_ (214) COL1.lcm

Sample Information

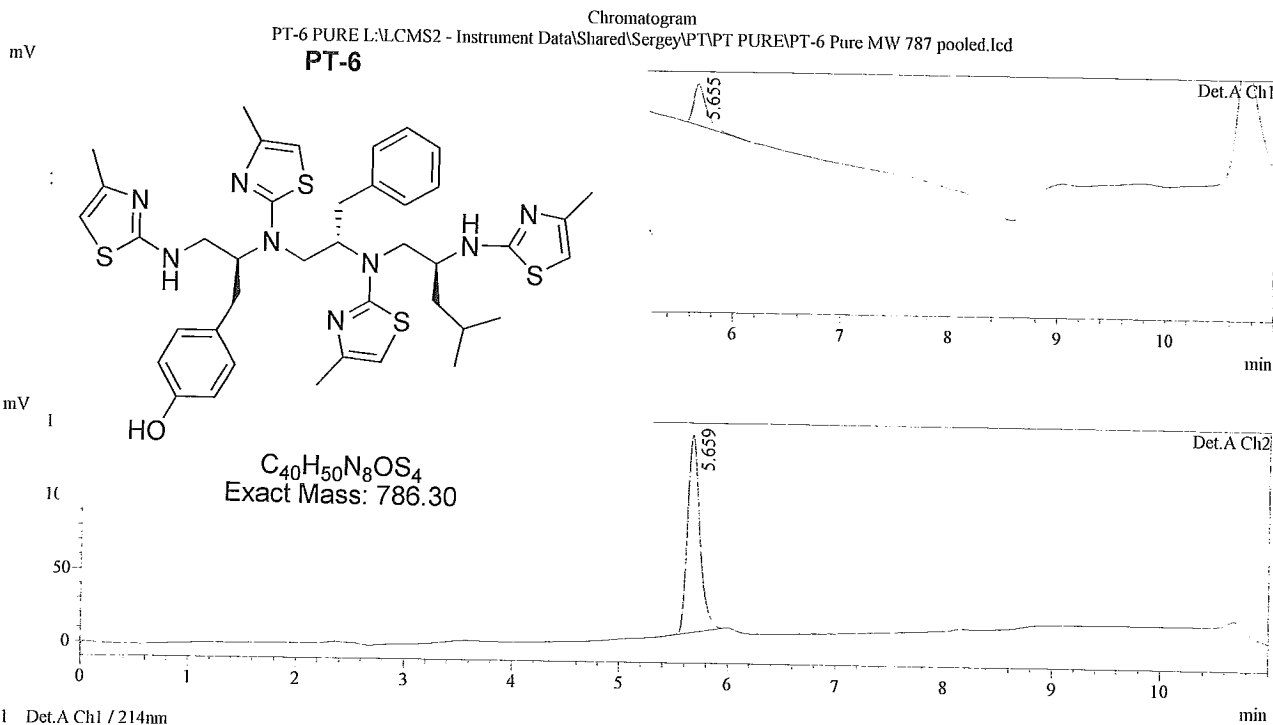

Detector A Ch1 214nm PeakTable

| Peak# | Ret. Time | Area    | Height | Area %  | Height % |
|-------|-----------|---------|--------|---------|----------|
| 1     | 5.655     | 1048245 | 130371 | 100.000 | 100.000  |
| Total |           | 1048245 | 130371 | 100.000 | 100.000  |

Detector A Ch2 254nm PeakTable

| Peak# | Ret. Time | Area    | Height | Area %  | Height % |
|-------|-----------|---------|--------|---------|----------|
| 1     | 5.659     | 1054009 | 134735 | 100.000 | 100.000  |
| Total |           | 1054009 | 134735 | 100.000 | 100.000  |

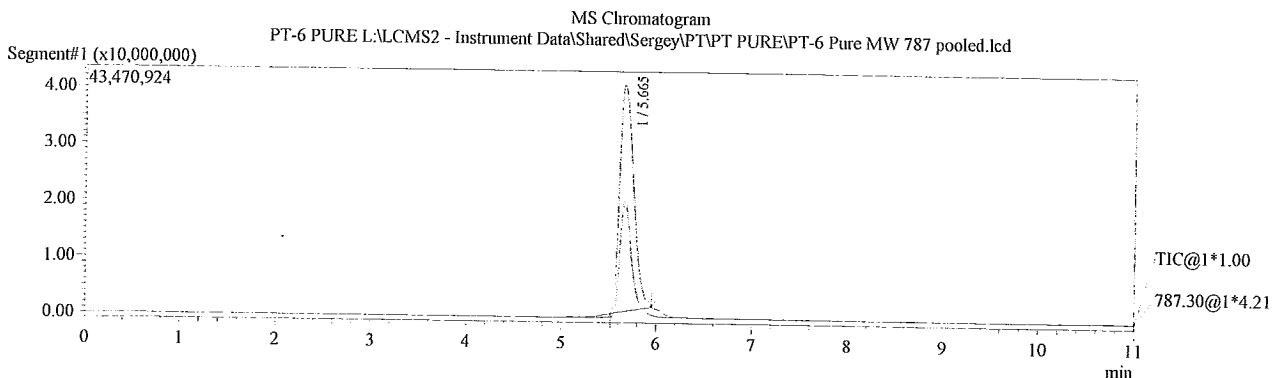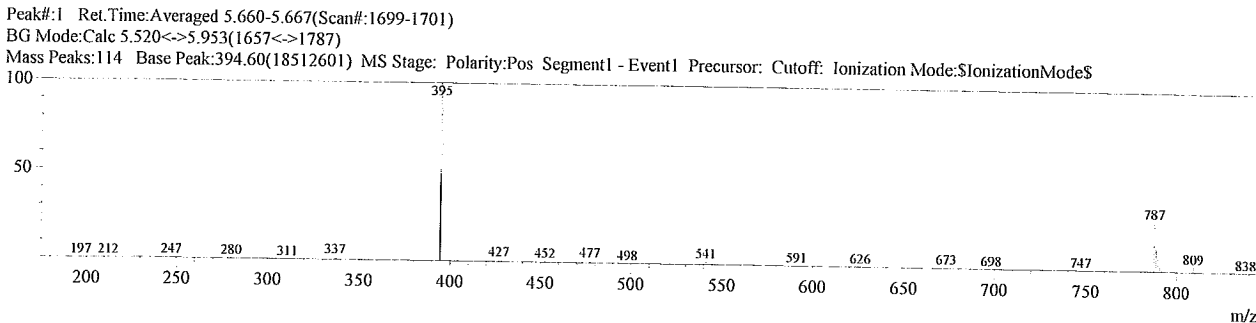

Date Acquired : 12/4/2009 3:12:05 PM  
 Sample Name : PT-7 PURE  
 Sample ID : MW 753 pooled  
 Vial # : 10  
 Injection Volume : 5  
 Data File : PT-7 Pure MW 753 pooled.lcd  
 Method File : 6min 5-95,1Min Clean(254)\_(214) COL1.lcm

Sample Information

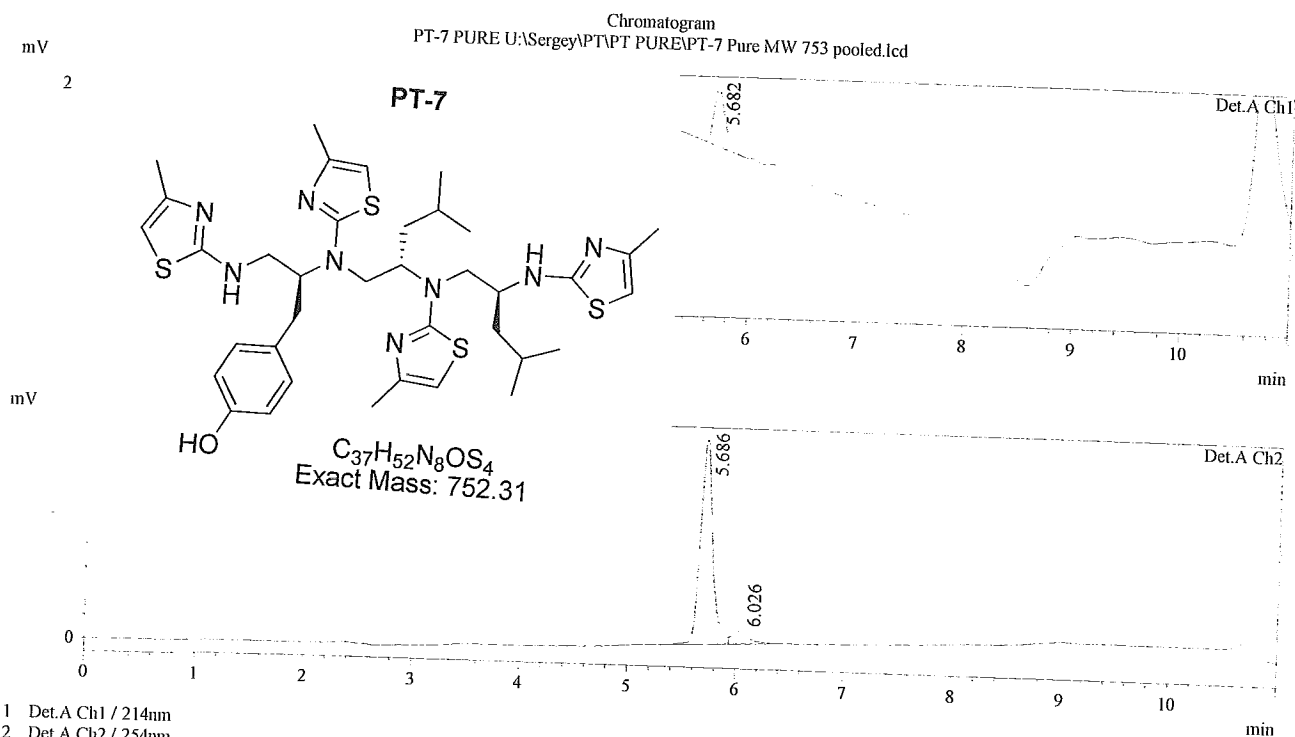

PeakTable

| Peak# | Ret. Time | Area   | Height | Area %  | Height % |
|-------|-----------|--------|--------|---------|----------|
| 1     | 5.682     | 917404 | 122940 | 100.000 | 100.000  |
| Total |           | 917404 | 122940 | 100.000 | 100.000  |

PeakTable

| Peak# | Ret. Time | Area    | Height | Area %  | Height % |
|-------|-----------|---------|--------|---------|----------|
| 1     | 5.686     | 1375537 | 172387 | 92.431  | 94.230   |
| 2     | 6.026     | 112633  | 10557  | 7.569   | 5.770    |
| Total |           | 1488170 | 182944 | 100.000 | 100.000  |

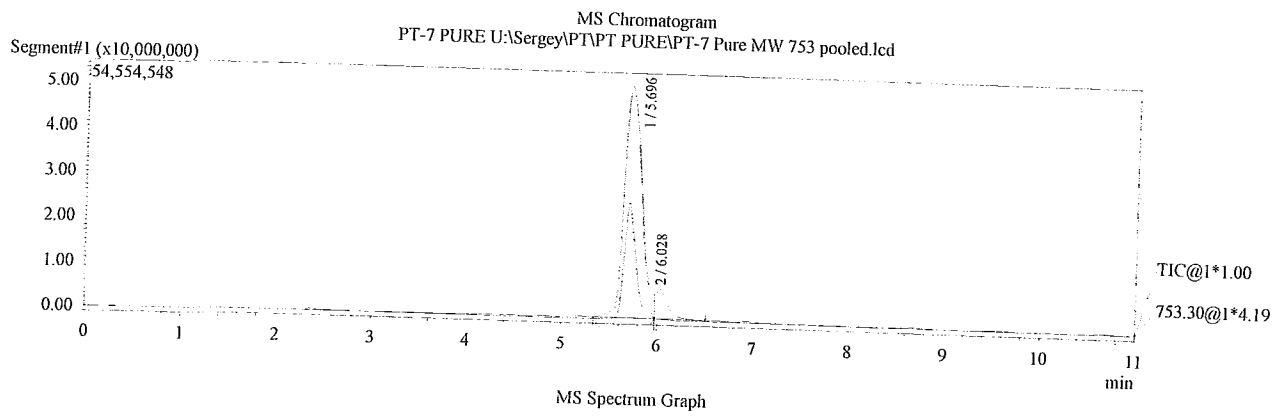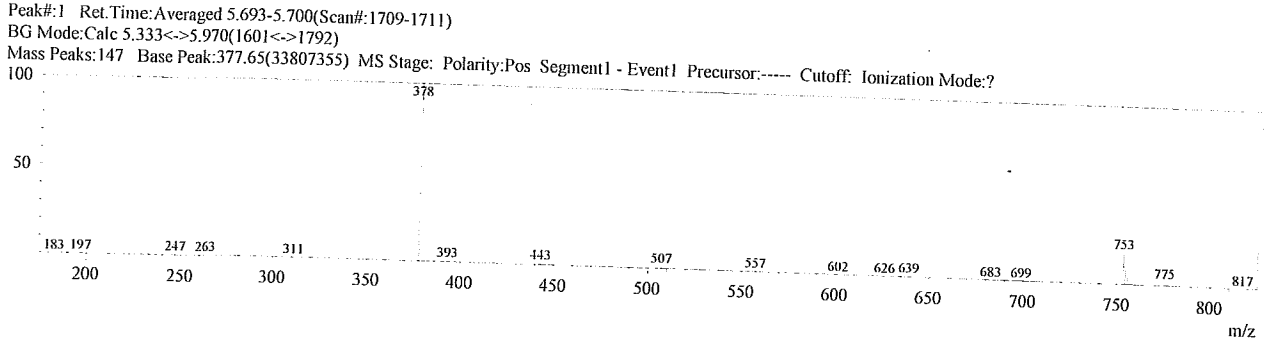

Supplement: NIHMS186993-supplement-1_si_001.pdf [file NIHMS186993-supplement-1_si_001.pdf]
